# Supplementary material for: Identification and Expression Analysis of Hormone Biosynthetic and Metabolism Genes in the 2OGD Family for Identifying Genes That May Be Involved in Tomato Fruit Ripening
Source: Int J Mol Sci. 2020 Jul 28;21(15):5344. doi: 10.3390/ijms21155344 (PMC7432023; doi:10.3390/ijms21155344)
Supplement: Supplementary file 1 [file ijms-21-05344-s001.zip › Supplementary Tables.xlsx]

## Sheet: Sheet1
Table S1 Identification and characterization of hormone biosynthetic and metabolism proteins in Arabidopsis, rice and tomato
GeneID	Gene Name	Group	Chromosome	Start	End	ORF Length	Protein Lentgth	Domain Name	Domain_From	Domain_To	Domain Length	E-Value	Domain Name	Domain_From	Domain_To	Domain Length	E-Value
AT4G25420.1	AtGA20ox1	GA20ox	4	12990884	12992458	1134	377	2OG-FeII_Oxy	223	322	100	8.3e-29	DIOX_N	61	176	116	7.3e-25
AT5G51810.1	AtGA20ox2	GA20ox	5	21055188	21056808	1137	378	2OG-FeII_Oxy	221	320	100	7.9e-28	DIOX_N	63	173	111	3.7e-23
AT5G07200.1	AtGA20ox3	GA20ox	5	2243553	2245339	1143	380	2OG-FeII_Oxy	222	321	100	1.4e-29	DIOX_N	58	173	116	3.6e-19
AT1G60980.1	AtGA20ox4	GA20ox	1	22452573	22454140	1131	376	2OG-FeII_Oxy	223	322	100	2.3e-27	DIOX_N	57	173	117	1.2e-19
AT1G44090.1	AtGA20ox5	GA20ox	1	16760677	16762486	1158	385	2OG-FeII_Oxy	226	324	99	1.1e-25	DIOX_N	63	175	113	1.8e-18
LOC_Os03g63970.1	OsGA20ox1	GA20ox	3	36150664	36152517	1119	372	2OG-FeII_Oxy	210	309	100	1.3e-25	DIOX_N	46	154	109	1.8e-22
LOC_Os01g66100.1	OsGA20ox2	GA20ox	1	38382382	38385504	1170	389	2OG-FeII_Oxy	225	324	100	1.8e-29	DIOX_N	63	184	122	3.3e-21
LOC_Os07g07420.1	OsGA20ox3	GA20ox	7	3702287	3705030	1104	367	2OG-FeII_Oxy	199	304	106	2.7e-25	DIOX_N	41	149	109	3.5e-21
LOC_Os05g34854.1	OsGA20ox4	GA20ox	5	20685346	20692274	1338	445	2OG-FeII_Oxy	271	371	101	4.2e-27	DIOX_N	107	220	114	2e-21
Solyc03g006880.2.1	SlGA20ox1	GA20ox	3	1408533	1410323	1137	378	2OG-FeII_Oxy	218	317	100	1.1e-28	DIOX_N	55	170	116	9.3e-25
Solyc06g035530.2.1	SlGA20ox2	GA20ox	6	24482418	24484616	1119	372	2OG-FeII_Oxy	215	314	100	1.6e-27	DIOX_N	52	167	116	4.3e-23
Solyc11g072310.1.1	SlGA20ox3	GA20ox	11	55508878	55511276	1140	379	2OG-FeII_Oxy	224	323	100	2.5e-28	DIOX_N	61	177	117	5.5e-23
Solyc01g093980.2.1	SlGA20ox4	GA20ox	1	85556502	85558519	1095	364	2OG-FeII_Oxy	210	309	100	9.5e-30	DIOX_N	46	161	116	6.6e-19
Solyc06g050110.1.1	SlGA20ox5	GA20ox	6	32452499	32454304	1092	363	2OG-FeII_Oxy	206	305	100	3.4e-24	DIOX_N	43	159	117	1.7e-23
Solyc09g009110.2.1	SlGA20ox6	GA20ox	9	2449483	2451293	1137	378	2OG-FeII_Oxy	218	317	100	3.3e-27	DIOX_N	55	170	116	1.9e-23
Solyc09g018420.1.1	SlGA20ox7	GA20ox	9	14827775	14828292	315	104	2OG-FeII_Oxy	1	95	95	7.7e-15
Solyc09g042210.1.1	SlGA20ox8	GA20ox	9	22583848	22584464	393	130	2OG-FeII_Oxy	1	99	99	7.4e-15
Solyc10g045690.1.1	SlGA20ox9	GA20ox	10	35042314	35043450	573	190	2OG-FeII_Oxy	94	188	95	1.7e-12
Solyc10g045770.1.1	SlGA20ox10	GA20ox	10	36076660	36077501	330	109	2OG-FeII_Oxy	27	109	83	2.7e-05
Solyc11g013360.1.1	SlGA20ox11	GA20ox	11	6347451	6350521	1038	345	2OG-FeII_Oxy	222	321	100	7.1e-25	DIOX_N	65	166	102	2.9e-20
AT1G15550.1	AtGA3ox1	GA3ox	1	5344478	5346166	1077	358	2OG-FeII_Oxy	208	308	101	5.5e-27	DIOX_N	57	161	105	2.6e-16
AT1G80340.1	AtGA3ox2	GA3ox	1	30200693	30202200	1044	347	2OG-FeII_Oxy	201	301	101	6.6e-27	DIOX_N	50	152	103	2.7e-16
AT4G21690.1	AtGA3ox3	GA3ox	4	11527229	11529060	1050	349	2OG-FeII_Oxy	202	305	104	9.6e-24	DIOX_N	47	152	106	3.4e-15
AT1G80330.1	AtGA3ox4	GA3ox	1	30200693	30202200	1044	347	2OG-FeII_Oxy	204	302	99	1.1e-26	DIOX_N	49	152	104	6.8e-19
LOC_Os05g08540.1	OsGA3ox1	GA3ox	5	4660662	4662589	1155	384	2OG-FeII_Oxy	226	327	102	1.4e-22	DIOX_N	67	173	107	4e-15
LOC_Os01g08220.1	OsGA3ox2	GA3ox	1	4003659	4004946	1122	373	2OG-FeII_Oxy	201	304	104	1.2e-20	DIOX_N	47	150	104	1.6e-15
Solyc06g066820.2.1	SlGA3ox1	GA3ox	6	42017428	42020038	1125	374	2OG-FeII_Oxy	210	309	100	4e-28	DIOX_N	50	160	111	1.4e-22
Solyc03g119910.2.1	SlGA3ox2	GA3ox	3	68457818	68459199	1068	355	2OG-FeII_Oxy	190	290	101	1.5e-28	DIOX_N	40	148	109	7.9e-19
Solyc01g058250.1.1	SlGA3ox3	GA3ox	1	65853391	65854603	1047	378	2OG-FeII_Oxy	199	301	103	2.2e-24	DIOX_N	54	158	105	1.9e-20
Solyc05g052740.1.1	SlGA3ox4	GA3ox	5	62927457	62928745	1050	349	2OG-FeII_Oxy	183	301	119	3.7e-25	DIOX_N	54	158	105	1.3e-21
AT1G78440.1	AtGA2ox1	GA2ox (C19)	1	29511599	29513051	990	329	2OG-FeII_Oxy	166	273	108	8.1e-28	DIOX_N	18	115	98	1.6e-14
AT1G30040.1	AtGA2ox2	GA2ox (C19)	1	10537648	10539831	1026	341	2OG-FeII_Oxy	180	283	104	7e-27	DIOX_N	24	140	117	1.3e-12
AT2G34555.1	AtGA2ox3	GA2ox (C19)	2	14556988	14558697	1008	335	2OG-FeII_Oxy	176	278	103	5e-27	DIOX_N	27	127	101	7.7e-13
AT1G47990.1	AtGA2ox4	GA2ox (C19)	1	17698655	17700834	966	321	2OG-FeII_Oxy	157	269	113	4.4e-23	DIOX_N	15	133	119	4e-17
AT1G02400.1	AtGA2ox6	GA2ox (C19)	1	486801	489577	990	329	2OG-FeII_Oxy	176	280	105	7.8e-23	DIOX_N	24	135	112	9.9e-16
LOC_Os05g06670.1	OsGA2ox1	GA2ox (C19)	5	3459616	3465991	1149	382	2OG-FeII_Oxy	190	321	132	6.1e-18	DIOX_N	36	117	82	4.6e-08
LOC_Os01g55240.1	OsGA2ox3	GA2ox (C19)	1	31795105	31797643	984	327	2OG-FeII_Oxy	174	278	105	3e-22	DIOX_N	28	113	86	4.3e-11
LOC_Os05g43880.1	OsGA2ox4	GA2ox (C19)	5	25515053	25516204	1065	354	2OG-FeII_Oxy	176	289	114	1.6e-23	DIOX_N	29	126	98	3.4e-10
LOC_Os01g11150.1	OsGA2ox7	GA2ox (C19)	1	5968819	5972489	1008	335	2OG-FeII_Oxy	179	287	109	1.8e-21	DIOX_N	24	112	89	2.4e-15
LOC_Os05g48700.1	OsGA2ox8	GA2ox (C19)	5	27910731	27912924	1062	353	2OG-FeII_Oxy	179	292	114	9e-25	DIOX_N	30	123	94	2e-14
LOC_Os05g11810.1	OsGA2ox10	GA2ox (C19)	5	6720998	6726973	1137	378	2OG-FeII_Oxy	111	216	106	5.7e-15
Solyc05g053340.2.1	SlGA2ox1	GA2ox (C19)	5	63465548	63472203	1050	349	2OG-FeII_Oxy	163	282	120	2.9e-19	DIOX_N	12	96	85	3.6e-12
Solyc07g056670.2.1	SlGA2ox2	GA2ox (C19)	7	64471405	64472965	969	322	2OG-FeII_Oxy	163	270	108	9.1e-28	DIOX_N	14	102	89	1.1e-12
Solyc01g079200.2.1	SlGA2ox3	GA2ox (C19)	1	78282910	78286020	1035	344	2OG-FeII_Oxy	173	295	123	3.8e-25	DIOX_N	23	108	86	2.3e-14
Solyc07g061720.2.1	SlGA2ox4	GA2ox (C19)	7	64681316	64682722	996	331	2OG-FeII_Oxy	177	282	106	4.3e-27	DIOX_N	28	126	99	8.1e-14
Solyc07g061730.2.1	SlGA2ox5	GA2ox (C19)	7	64693608	64695085	1008	335	2OG-FeII_Oxy	178	283	106	9.4e-28	DIOX_N	29	127	99	9.7e-14
Solyc01g058030.1.1	SlGA2ox6	GA2ox (C19)	1	64959482	64960712	654	217	2OG-FeII_Oxy	56	160	105	1.8e-22
Solyc02g070430.2.1	SlGA2ox7	GA2ox (C19)	2	40156961	40159000	1026	341	2OG-FeII_Oxy	182	288	107	6e-21	DIOX_N	34	136	103	5.5e-13
Solyc08g016660.1.1	SlGA2ox8	GA2ox (C19)	8	8370077	8372219	1065	354	2OG-FeII_Oxy	181	288	108	7.1e-24	DIOX_N	33	115	83	1.2e-11
Solyc10g007570.2.1	SlGA2ox9	GA2ox (C19)	10	1874161	1875884	573	190	2OG-FeII_Oxy	33	139	107	2.8e-27
AT1G50960.1	AtGA2ox7	GA2ox (C20)	1	18889549	18891719	1011	336	2OG-FeII_Oxy	192	291	100	1.4e-23	DIOX_N	40	154	115	6.3e-16
AT4G21200.1	AtGA2ox8	GA2ox (C20)	4	11302685	11306601	1017	338	2OG-FeII_Oxy	186	290	105	6.8e-29	DIOX_N	42	156	115	7.5e-18
LOC_Os07g01340.1	OsGA2ox5	GA2ox (C20)	7	213778	219544	1026	341	2OG-FeII_Oxy	188	290	103	1e-24	DIOX_N	42	156	115	3.6e-14
LOC_Os04g44150.1	OsGA2ox6	GA2ox (C20)	4	26130707	26134356	1077	358	2OG-FeII_Oxy	209	308	100	3.2e-25	DIOX_N	50	152	103	2.9e-17
LOC_Os02g41954.1	OsGA2ox9	GA2ox (C20)	2	25199386	25203742	1080	359	2OG-FeII_Oxy	214	314	101	2.4e-28	DIOX_N	47	163	117	1.2e-15
Solyc02g080120.1.1	SlGA2ox10	GA2ox (C20)	2	44432042	44436667	1143	380	2OG-FeII_Oxy	233	332	100	3.1e-27	DIOX_N	82	200	119	5.8e-16
Solyc04g008670.1.1	SlGA2ox11	GA2ox (C20)	4	2314687	2317056	1074	357	2OG-FeII_Oxy	213	312	100	7e-29	DIOX_N	62	174	113	4.3e-15
Solyc10g005360.2.1	SlGA2ox12	GA2ox (C20)	10	261366	264169	870	289	2OG-FeII_Oxy	188	269	82	7.2e-16	DIOX_N	37	146	110	4.2e-13
AT1G14130.1	AtDAO1	DAO	1	4835724	4837616	927	308	2OG-FeII_Oxy	152	253	102	3.3e-18	DIOX_N	9	109	101	4.3e-12
AT1G14120.1	AtDAO2	DAO	1	4833518	4835089	939	312	2OG-FeII_Oxy	151	252	102	1.5e-18	DIOX_N	8	115	108	1.6e-12
LOC_Os04g39980.1	OsDAO	DAO	4	23795409	23797531	903	300	2OG-FeII_Oxy	150	251	102	3.6e-17	DIOX_N	4	92	89	3.5e-13
Solyc02g068310.2.1	SlDAO1	DAO	2	38286811	38289407	906	301	2OG-FeII_Oxy	149	249	101	4.7e-17	DIOX_N	7	119	113	2e-09
Solyc02g068320.2.1	SlDAO2	DAO	2	38293080	38295460	906	301	2OG-FeII_Oxy	149	249	101	7.3e-18	DIOX_N	7	118	112	1.4e-10
Solyc02g068330.1.1	SlDAO3	DAO	2	38297801	38298903	774	257	2OG-FeII_Oxy	104	204	101	1.7e-18
AT2G19590.1	AtACO1	ACO	2	8475966	8477502	933	310	2OG-FeII_Oxy	159	259	101	2.1e-25	DIOX_N	11	114	104	1.7e-15
AT1G62380.1	AtACO2	ACO	1	23082170	23084253	963	320	2OG-FeII_Oxy	141	256	116	5.1e-28	DIOX_N	7	118	112	6.9e-15
AT1G12010.1	AtACO3	ACO	1	4056207	4057933	963	320	2OG-FeII_Oxy	143	256	114	7.3e-28	DIOX_N	1	114	114	2.1e-16
AT1G05010.1	AtACO4	ACO	1	1431190	1432858	972	323	2OG-FeII_Oxy	154	254	101	3.4e-29	DIOX_N	4	114	111	6.2e-18
AT1G77330.1	AtACO5	ACO	1	29062990	29064537	924	307	2OG-FeII_Oxy	157	256	100	2.2e-25	DIOX_N	3	116	114	1.1e-18
LOC_Os09g27820.1	OsACO1	ACO	9	16925457	16927082	969	322	2OG-FeII_Oxy	160	259	100	6.2e-28	DIOX_N	7	119	113	2.2e-17
LOC_Os09g27750.1	OsACO2	ACO	9	16886019	16887617	969	322	2OG-FeII_Oxy	160	259	100	6.7e-28	DIOX_N	7	119	113	3e-13
LOC_Os02g53180.1	OsACO3	ACO	2	32558635	32562705	1035	344	2OG-FeII_Oxy	181	280	100	1.2e-26
LOC_Os11g08380.1	OsACO4	ACO	11	4415910	4418435	930	309	2OG-FeII_Oxy	159	262	104	1.9e-23	DIOX_N	3	124	122	2e-14
LOC_Os05g05680.1	OsACO5	ACO	5	2825323	2826992	927	308	2OG-FeII_Oxy	160	259	100	3.2e-26	DIOX_N	3	123	121	9.8e-18
LOC_Os05g05670.1	OsACO6	ACO	5	2819527	2821454	474	157	2OG-FeII_Oxy	83	157	75	1.7e-17
LOC_Os01g39860.1	OsACO7	ACO	1	22489496	22491483	939	312	2OG-FeII_Oxy	162	264	103	1.6e-22	DIOX_N	3	121	119	7.5e-16
LOC_Os06g37590.1	OsACO8	ACO	6	22258061	22259545	882	293	2OG-FeII_Oxy	144	246	103	1.4e-20	DIOX_N	3	106	104	7.3e-12
Solyc07g049530.2.1	SlACO1	ACO	7	59830720	59832891	948	315	2OG-FeII_Oxy	154	253	100	4.8e-27	DIOX_N	4	117	114	2.1e-13
Solyc12g005940.1.1	SlACO2	ACO	12	563621	566130	951	316	2OG-FeII_Oxy	154	253	100	1.9e-27	DIOX_N	4	113	110	4.7e-13
Solyc07g049550.2.1	SlACO3	ACO	7	59847436	59849308	951	316	2OG-FeII_Oxy	154	253	100	5.4e-27	DIOX_N	4	117	114	2.8e-13
Solyc02g081190.2.1	SlACO4	ACO	2	45250838	45252543	963	320	2OG-FeII_Oxy	155	254	100	1.3e-27	DIOX_N	5	114	110	1.7e-16
Solyc07g026650.2.1	SlACO5	ACO	7	30139957	30141385	906	301	2OG-FeII_Oxy	152	252	101	5.1e-23	DIOX_N	3	104	102	8.5e-13
Solyc02g036350.2.1	SlACO6	ACO	2	30572118	30574305	960	319	2OG-FeII_Oxy	154	253	100	1.1e-26	DIOX_N	4	108	105	3.6e-13
Solyc06g060070.2.1	SlACO7	ACO	6	37978857	37981633	945	314	2OG-FeII_Oxy	153	257	105	2.5e-26	DIOX_N	4	118	115	4.4e-18
AT3G11180.2	AtJOX1	JOX	3	3504204	3507057	1212	403	2OG-FeII_Oxy	249	349	101	4.9e-29	DIOX_N	95	203	109	9.1e-27
AT5G05600.1	AtJOX2	JOX	5	1672120	1674739	1116	371	2OG-FeII_Oxy	220	320	101	2.7e-29	DIOX_N	62	174	113	3e-27
AT3G55970.1	AtJOX3	JOX	3	20766735	20769324	1092	363	2OG-FeII_Oxy	211	312	102	7.7e-27	DIOX_N	52	164	113	6.2e-28
AT2G38240.1	AtJOX4	JOX	2	16012535	16014753	1062	353	2OG-FeII_Oxy	203	302	100	3.9e-27	DIOX_N	48	155	108	1.9e-28
LOC_Os01g61610.1	OsJOX1	JOX	1	35636303	35641236	1101	361	2OG-FeII_Oxy	208	308	101	1.2e-27	DIOX_N	51	161	111	2.8e-26
LOC_Os03g18030.1	OsJOX2	JOX	3	10038840	10044429	1164	387	2OG-FeII_Oxy	211	311	101	1.7e-25	DIOX_N	53	159	107	6e-24
LOC_Os05g03640.1	OsJOX3	JOX	5	1561980	1568165	1107	368	2OG-FeII_Oxy	207	306	100	1.3e-25	DIOX_N	54	159	106	2.5e-24
LOC_Os11g25060.1	OsJOX4	JOX	11	14285137	14290853	1176	391	2OG-FeII_Oxy	215	315	101	1e-25	DIOX_N	52	168	117	6.2e-24
Solyc03g096050.2.1	SlJOX1	JOX	3	57870688	57873851	1074	351	2OG-FeII_Oxy	198	298	101	5.1e-28	DIOX_N	49	152	104	4.3e-27
Solyc10g076660.1.1	SlJOX2	JOX	10	59609343	59612023	1098	365	2OG-FeII_Oxy	214	314	101	2.3e-27	DIOX_N	55	167	113	1.1e-32
Solyc10g085190.1.1	SlJOX3	JOX	10	64457633	64459876	1086	361	2OG-FeII_Oxy	210	310	101	1.2e-27	DIOX_N	51	163	113	1.2e-28
AT5G24530.1	AtDMR6	DMR6	5	8378833	8383401	1026	341	2OG-FeII_Oxy	188	288	101	5.8e-27	DIOX_N	38	144	107	5.4e-26
AT4G10500.1	AtDLO1	DMR6	4	6491017	6492476	1050	349	2OG-FeII_Oxy	197	296	100	1.3e-30	DIOX_N	44	153	110	1.2e-24
AT4G10490.1	AtDLO2	DMR6	4	6483867	6485360	1047	348	2OG-FeII_Oxy	197	296	100	1.3e-30	DIOX_N	44	153	110	1.2e-24
LOC_Os03g03034.1	OsF3H	DMR6	3	1235373	1245060	1029	342	2OG-FeII_Oxy	187	287	101	7.5e-29	DIOX_N	37	146	110	5.3e-24
LOC_Os04g49194.1	OsDLO1	DMR6	4	29331563	29338265	1023	340	2OG-FeII_Oxy	189	290	102	5e-27	DIOX_N	39	149	111	2.6e-26
LOC_Os04g49210.1	OsDLO2	DMR6	4	29338950	29341166	1059	352	2OG-FeII_Oxy	198	297	100	4.9e-29	DIOX_N	45	154	110	3.6e-28
LOC_Os10g39140.1	OsDLO3	DMR6	10	20886352	20892217	1029	342	2OG-FeII_Oxy	193	293	101	9.7e-30	DIOX_N	43	152	110	1.6e-26
Solyc03g080190.2.1	SlDLO1	DMR6	3	52078938	52083877	1014	337	2OG-FeII_Oxy	188	288	101	5.4e-29	DIOX_N	38	146	109	3.4e-27
Solyc06g073080.2.1	SlDLO2	DMR6	6	45017961	45020918	963	320	2OG-FeII_Oxy	168	268	101	1.1e-27	DIOX_N	41	94	54	1.2e-11
AT3G21420.1	AtLBO1	LBO	3	7541477	7543518	1095	364	2OG-FeII_Oxy	211	312	102	2.1e-24	DIOX_N	55	167	113	3.2e-31
LOC_Os01g70930.1	OsLBO1	LBO	1	41057016	41058872	1101	366	2OG-FeII_Oxy	216	317	102	1.9e-25	DIOX_N	64	172	109	7.4e-31
Solyc01g067620.2.1	SlLBO1	LBO	1	76454195	76456121	1092	363	2OG-FeII_Oxy	209	311	103	4.2e-23	DIOX_N	55	165	111	2.4e-30

## Sheet: Sheet2
Table S2 Microsynteny relationships of hormone biosynthetic and metabolism genes in Arabidopsis, rice and tomato
Collinear Gene Pairs
Gene ID	Gene Name	Gene ID	Gene Name
AT1G12010.1	AtACO3	Solyc02g081190.2.1	SlACO4
AT1G62380.1	AtACO2	Solyc02g081190.2.1	SlACO4
AT1G12010.1	AtACO3	Solyc02g036350.2.1	SlACO6
AT1G30040.1	AtACO5	Solyc02g070430.2.1	SlACO7
AT1G15550.1	AtACO4	Solyc03g119910.2.1	SlACO1
AT1G47990.1	AtGA3ox1	Solyc05g053340.2.1	SlGA3ox2
AT1G77330.1	AtGA3ox1	Solyc06g060070.2.1	SlGA3ox1
AT1G15550.1	AtGA2ox2	Solyc06g066820.2.1	SlGA2ox7
AT1G78440.1	AtGA2ox4	Solyc07g061720.2.1	SlGA2ox1
AT1G05010.1	AtGA2ox1	Solyc07g049530.2.1	SlGA2ox4
AT1G30040.1	AtGA2ox2	Solyc08g016660.1.1	SlGA2ox8
AT2G38240.1	AtJOX4	Solyc10g085190.1.1	SlJOX3
AT2G38240.1	AtJOX4	Solyc10g076660.1.1	SlJOX2
AT3G11180.2	AtJOX1	Solyc03g096050.2.1	SlJOX1
AT3G55970.1	AtJOX3	Solyc03g096050.2.1	SlJOX1
AT3G11180.2	AtJOX1	Solyc10g085190.1.1	SlJOX3
AT4G21200.1	AtJOX2	Solyc02g080120.1.1	SlJOX2
AT4G25420.1	AtGA2ox8	Solyc03g006880.2.1	SlGA2ox10
AT4G25420.1	AtGA2ox8	Solyc06g035530.2.1	SlGA2ox12
AT4G21200.1	AtGA20ox1	Solyc10g005360.2.1	SlGA20ox2
AT5G51810.1	AtGA20ox1	Solyc03g006880.2.1	SlGA20ox1
AT5G51810.1	AtGA20ox2	Solyc06g035530.2.1	SlGA20ox1
AT5G05600.1	AtGA20ox2	Solyc10g076660.1.1	SlGA20ox2
AT5G24530.1	AtDMR6	Solyc03g080190.2.1	SlDLO1
AT5G24530.1	AtDMR6	Solyc06g073080.2.1	SlDLO2
AT3G55970.1	AtJOX3	LOC_Os01g61610.1	OsJOX1
LOC_Os03g18030.1	OsJOX2	Solyc10g076660.1.1	SlJOX2

## Sheet: Sheet3
Table S3 Duplication modes of hormone biosynthetic and metabolism genes in tomato
Gene duplication modes	Duplicate 1	Subfamily	Duplicate 2	Subfamily
Dispersed	SlGA20ox1	GA20ox	SlGA20ox4	GA20ox
Dispersed	SlGA20ox2	GA20ox	SlGA20ox3	GA20ox
Dispersed	SlGA20ox3	GA20ox	SlGA20ox6	GA20ox
Dispersed	SlGA20ox3	GA20ox	SlGA20ox11	GA20ox
Dispersed	SlGA20ox5	GA20ox	SlGA20ox6	GA20ox
Dispersed	SlGA20ox6	GA20ox	SlGA20ox8	GA20ox
Dispersed	SlGA20ox6	GA20ox	SlGA20ox9	GA20ox
Dispersed	SlGA20ox6	GA20ox	SlGA20ox10	GA20ox
Dispersed	SlGA20ox7	GA20ox	SlGA20ox8	GA20ox
WGD	SlGA20ox1	GA20ox	SlGA20ox2	GA20ox
Dispersed	SlGA3ox1	GA3ox	SlGA3ox4	GA3ox
Dispersed	SlGA3ox3	GA3ox	SlGA3ox4	GA3ox
WGD	SlGA3ox1	GA3ox	SlGA3ox2	GA3ox
Dispersed	SlGA2ox1	GA2ox (C19)	SlGA2ox2	GA2ox (C19)
Dispersed	SlGA2ox1	GA2ox (C19)	SlGA2ox6	GA2ox (C19)
Dispersed	SlGA2ox2	GA2ox (C19)	SlGA2ox3	GA2ox (C19)
Dispersed	SlGA2ox2	GA2ox (C19)	SlGA2ox5	GA2ox (C19)
Dispersed	SlGA2ox4	GA2ox (C19)	SlGA2ox8	GA2ox (C19)
Dispersed	SlGA2ox5	GA2ox (C19)	SlGA2ox8	GA2ox (C19)
Dispersed	SlGA2ox5	GA2ox (C19)	SlGA2ox9	GA2ox (C19)
Dispersed	SlGA2ox5	GA2ox (C19)	SlGA2ox7	GA2ox (C19)
Tandem	SlGA2ox4	GA2ox (C19)	SlGA2ox5	GA2ox (C19)
Dispersed	SlGA2ox11	GA2ox (C20)	SlGA2ox12	GA2ox (C20)
WGD	SlGA2ox10	GA2ox (C20)	SlGA2ox12	GA2ox (C20)
Tandem	SlDAO1	DAO	SlDAO2	DAO
Tandem	SlDAO2	DAO	SlDAO1	DAO
Dispersed	SlJOX1	JOX	SlJOX2	JOX
WGD	SlJOX2	JOX	SlJOX3	JOX
Dispersed	SlACO1	ACO	SlACO6	ACO
Dispersed	SlACO1	ACO	SlACO7	ACO
Dispersed	SlACO2	ACO	SlACO3	ACO
Dispersed	SlACO3	ACO	SlACO4	ACO
Dispersed	SlACO4	ACO	SlACO5	ACO
WGD	SlACO1	ACO	SlACO2	ACO
WGD	SlACO4	ACO	SlACO6	ACO
WGD	SlDLO1	DMR6	SlDLO2	DMR6

## Sheet: Sheet4
Table S4 Motif composition in DOXC class of 2OGD family in Arabidopsis, rice and tomato
Proteins	Motif 1	Motif 2	Motif 3	Motif 4	Motif 5	Motif 6	Motif 7	Motif 8	Motif 9	Motif 10	Motif 11	Motif 12	Motif 13	Motif 14	Motif 15	Motif 16	Motif 17	Motif 18	Motif 19	Motif 20	Motif 21	Motif 22	Motif 23	Motif 24	Motif 25	Motif 26	Motif 27	Motif 28	Motif 29	Motif 30	Motif 31	Motif 32	Motif 33	Motif 34	Motif 35	Motif 36	Motif 37	Motif 38	Motif 39	Motif 40	Motif 41	Motif 42	Motif 43	Motif 44	Motif 45	Motif 46	Motif 47	Motif 48	Motif 49
Solyc09g089580.2.1	1	1	1	1	1	1	1	1	0	1	1	1	1	0	0	0	1	1	1	0	0	1	1	0	0	1	0	0	0	0	0	0	0	1	0	0	1	0	0	0	0	0	0	0	0	0	0	0	0
Solyc03g095920.1.1	1	0	1	1	1	0	0	1	0	1	0	1	1	0	0	0	0	0	1	0	0	1	0	0	0	0	0	0	0	0	0	0	0	1	0	0	1	0	0	0	0	0	0	0	0	0	0	0	0
Solyc03g095900.2.1	1	1	1	1	1	1	1	1	0	1	0	1	1	0	0	0	1	1	1	0	0	1	1	0	0	1	0	0	0	0	0	0	0	1	0	0	1	0	0	0	0	0	0	0	0	0	0	0	0
Solyc09g089710.2.1	0	1	0	1	1	1	0	1	0	0	1	0	0	0	0	0	0	1	0	0	0	0	1	0	0	0	0	0	0	0	0	0	0	0	0	0	0	0	0	0	0	0	0	0	0	0	0	0	0
Solyc09g089730.2.1	1	1	1	1	1	1	1	1	0	1	1	1	1	0	0	0	1	1	1	1	0	1	1	0	0	1	0	0	0	0	0	0	0	1	0	0	1	0	0	0	0	0	0	0	0	0	0	0	0
Solyc09g089740.2.1	1	1	1	1	1	0	1	1	0	1	0	1	1	0	0	0	1	0	1	1	0	1	0	0	0	1	0	0	0	0	0	0	0	1	0	0	1	0	0	0	0	0	0	0	0	0	0	0	0
Solyc09g089690.2.1	1	1	1	1	1	1	1	1	0	0	0	1	1	0	0	1	1	1	1	1	0	1	1	0	0	0	0	0	0	0	0	0	0	1	0	0	1	0	0	0	0	0	0	0	0	0	0	0	0
Solyc09g089760.1.1	1	1	1	1	1	1	1	1	0	1	0	1	1	0	0	0	1	1	1	1	0	1	1	0	0	1	0	0	0	0	0	0	0	1	0	0	1	0	0	0	0	0	0	0	0	0	0	0	0
Solyc09g089720.1.1	0	1	1	1	1	1	1	1	1	1	0	1	1	0	0	0	1	1	1	1	0	0	1	0	0	1	0	0	0	0	0	0	0	0	0	0	1	0	0	0	0	0	0	0	0	0	0	0	0
Solyc09g089680.2.1	1	1	1	1	1	1	1	1	0	1	0	1	1	0	0	0	1	1	1	1	0	1	1	0	0	1	0	0	0	0	0	0	0	1	0	0	1	0	0	0	0	0	0	0	0	0	0	0	0
Solyc12g006380.1.1	1	1	1	1	1	1	1	1	0	1	0	1	1	0	0	0	1	1	1	1	0	1	1	0	0	1	0	0	0	0	0	0	0	0	0	0	1	0	0	0	0	0	0	0	0	0	0	0	0
Solyc09g010000.2.1	1	1	1	1	1	1	1	1	0	1	0	1	1	0	0	0	1	1	1	1	0	1	1	0	0	1	0	0	0	0	0	0	0	1	0	0	1	0	0	0	0	0	0	0	0	0	0	0	0
Solyc09g010040.1.1	1	1	1	1	1	1	1	1	0	1	0	1	1	0	0	0	1	1	1	1	0	1	1	0	0	1	0	0	0	0	0	0	0	1	0	0	0	0	0	0	0	0	0	0	0	0	0	0	0
Solyc06g053650.1.1	0	1	1	1	1	1	0	1	0	0	0	0	0	0	0	0	0	1	0	0	0	0	1	0	0	0	0	0	0	0	0	0	0	0	0	0	0	0	0	0	0	0	0	0	0	0	0	0	0
Solyc09g010010.1.1	0	1	1	1	0	1	1	1	0	0	1	0	0	0	0	0	0	0	0	1	0	0	1	0	0	0	0	0	0	0	0	0	0	0	0	0	0	0	0	0	0	0	0	0	0	0	0	0	0
Solyc09g010020.2.1	1	1	1	1	1	1	1	1	0	1	0	1	1	0	0	0	1	1	1	1	0	1	1	0	0	1	0	0	0	0	0	0	0	1	0	0	1	0	0	0	0	0	0	0	0	0	0	0	0
AT1G03410.1	1	1	1	1	1	1	1	1	0	1	0	1	1	0	0	0	1	0	1	1	0	1	1	0	0	1	0	0	0	0	0	0	0	1	0	0	1	0	0	0	0	0	0	0	0	0	0	0	0
AT1G03400.1	1	1	1	1	1	1	1	1	0	1	0	1	1	0	0	0	1	0	1	1	0	1	1	0	0	1	0	0	0	0	0	0	0	0	0	0	1	0	0	0	0	0	0	0	0	0	0	0	0
AT3G61400.1	1	1	1	1	1	1	1	1	0	1	1	1	1	0	0	0	1	0	1	1	0	1	1	0	0	1	0	0	0	0	0	0	0	1	0	0	1	0	0	0	0	0	0	0	0	0	0	0	0
AT1G06620.1	1	1	1	1	1	1	1	1	0	1	1	1	1	0	0	0	1	1	1	1	0	1	1	0	0	1	0	0	0	0	0	0	0	1	0	0	1	0	0	0	0	0	0	0	0	0	0	0	0
AT2G30840.1	1	1	1	1	1	1	1	1	0	1	1	1	1	0	0	0	1	1	1	1	0	1	1	0	0	1	0	0	0	0	0	0	0	1	0	0	1	0	0	0	0	0	0	0	0	0	0	0	0
AT2G25450.1	1	1	1	1	1	1	1	1	0	1	0	1	1	0	0	0	1	1	1	1	0	1	1	0	0	1	0	0	0	0	0	0	0	1	0	0	1	0	0	0	0	0	0	0	0	0	0	0	0
AT2G30830.1	1	1	1	1	1	1	1	1	0	1	0	1	1	0	0	0	1	1	1	1	0	1	1	0	0	1	0	0	0	0	0	0	0	1	0	0	1	0	0	0	0	0	0	0	0	0	0	0	0
AT1G06640.1	1	1	1	1	1	1	1	1	0	1	0	1	1	0	0	0	1	1	1	1	0	1	1	0	0	1	0	0	0	0	0	0	0	1	0	0	1	0	0	0	0	0	0	0	0	0	0	0	0
AT1G06650.2	1	1	1	1	1	1	1	1	0	1	0	1	1	0	0	0	1	1	1	1	0	1	1	0	0	1	0	0	0	0	0	0	0	1	0	0	1	0	0	0	0	0	0	0	0	0	0	0	0
AT1G06645.1	1	1	1	1	1	1	1	1	0	1	0	1	1	0	0	0	0	1	1	1	0	1	1	0	0	1	0	0	0	0	0	0	0	1	0	0	1	0	0	0	0	0	0	0	0	0	0	0	0
AT5G43450.1	1	1	1	1	1	1	1	1	0	1	0	1	1	0	0	0	1	1	1	1	0	1	1	0	0	1	0	0	0	0	0	0	0	0	0	0	1	0	0	0	0	0	0	0	0	0	0	0	0
AT5G43440.1	1	1	1	1	1	1	1	1	0	1	0	1	1	0	0	0	1	1	1	1	0	1	1	0	0	1	0	0	0	0	0	0	0	0	0	0	0	0	0	0	0	0	0	0	0	0	0	0	0
AT1G04380.1	1	1	1	1	1	1	1	1	0	1	0	1	0	0	0	1	1	1	1	1	0	1	1	0	0	0	0	0	0	0	0	0	0	0	0	0	1	0	0	0	0	0	0	0	0	0	0	0	0
AT1G04350.1	1	1	1	1	1	1	1	1	0	1	0	1	1	0	0	0	1	1	1	1	0	1	1	0	0	1	0	0	0	0	0	0	0	0	0	0	1	0	0	0	0	0	0	0	0	0	0	0	0
AT5G59540.1	1	1	1	1	1	1	1	1	0	1	0	1	1	0	0	0	1	1	1	1	0	1	1	0	0	1	0	0	0	0	0	0	0	1	0	0	1	0	0	0	0	0	0	0	0	0	0	0	0
AT5G59530.1	1	1	1	1	1	1	1	1	0	1	0	1	1	0	0	0	1	1	0	1	0	1	1	0	0	1	0	0	0	0	0	0	0	1	0	0	1	0	0	0	0	0	0	0	0	0	0	0	0
LOC Os04g10350.1	1	1	1	1	1	1	1	1	0	1	0	1	1	0	0	0	1	0	1	1	0	1	1	0	0	1	0	0	0	0	0	0	0	0	0	0	1	0	0	0	0	0	0	0	0	0	0	0	0
Solyc09g089770.2.1	1	0	1	1	1	0	1	1	0	1	0	1	1	0	0	0	1	0	1	1	0	1	0	0	0	1	0	0	0	0	0	0	0	0	0	0	1	0	0	0	0	0	0	0	0	0	0	0	0
Solyc04g009860.2.1	1	1	1	1	1	1	1	1	0	1	0	1	1	1	0	0	1	0	1	1	0	1	1	0	0	1	0	0	0	0	0	0	0	1	0	0	1	0	0	0	0	0	0	0	0	0	0	0	0
Solyc04g009850.2.1	1	1	1	1	1	1	1	1	0	1	0	1	1	1	0	0	1	0	1	1	0	1	1	0	0	1	0	0	0	0	0	0	0	1	0	0	1	0	0	0	0	0	0	0	0	0	0	0	0
Solyc09g057930.1.1	0	0	1	1	0	0	1	1	0	0	1	0	1	0	0	0	0	0	0	0	0	0	1	0	0	0	0	0	0	0	0	0	0	0	0	0	0	0	0	0	0	0	0	0	0	0	0	0	0
Solyc12g042020.1.1	0	0	1	1	1	0	0	1	0	0	0	0	1	0	0	0	0	0	0	0	0	0	0	0	0	0	0	0	0	0	0	0	0	0	0	0	0	0	0	0	0	0	0	0	0	0	0	0	0
Solyc01g016640.1.1	1	0	0	1	1	0	0	1	0	0	0	0	0	0	0	0	0	0	0	0	0	1	0	0	0	0	1	0	0	0	0	0	0	0	0	0	0	0	0	0	0	0	0	0	0	0	0	0	0
Solyc01g016680.1.1	0	0	0	1	1	0	0	1	0	0	0	0	1	0	0	0	0	0	0	0	0	0	0	0	0	0	0	0	0	0	0	0	0	0	0	0	0	0	0	0	0	0	0	0	0	0	0	0	0
Solyc12g042030.1.1	0	0	1	1	1	0	0	1	0	0	0	0	1	0	0	0	0	0	0	0	0	0	0	0	0	1	0	0	0	0	0	0	0	0	0	0	0	0	0	0	0	0	0	0	0	0	0	0	0
Solyc09g089790.2.1	1	1	1	1	1	1	1	1	0	1	0	1	1	1	0	0	1	1	1	1	0	1	1	0	0	0	0	0	0	0	0	0	0	0	0	0	0	0	0	0	0	0	0	0	0	0	0	0	0
Solyc09g089800.1.1	1	1	1	1	1	1	1	1	0	1	0	1	1	1	0	0	1	1	1	1	0	1	1	0	0	0	0	0	0	0	0	0	0	0	0	0	0	0	0	0	0	0	0	0	0	0	0	0	0
Solyc09g089830.2.1	1	1	1	1	1	1	1	1	0	1	0	1	1	0	0	0	1	0	0	1	0	1	1	0	0	0	0	0	0	0	0	0	0	0	0	0	0	0	0	0	0	0	0	0	0	0	0	0	0
Solyc09g089780.2.1	1	1	1	1	1	1	1	1	0	1	0	1	1	1	0	0	1	0	1	1	0	1	1	0	0	0	0	0	0	0	0	0	0	0	0	0	0	0	0	0	0	0	0	0	0	0	0	0	0
Solyc09g089840.1.1	0	0	0	1	1	0	1	1	0	0	0	0	0	0	0	0	0	0	0	0	0	0	0	0	0	0	0	0	0	0	0	0	0	0	0	0	0	0	0	0	0	0	0	0	0	0	0	0	0
Solyc09g089810.1.1	1	1	1	1	1	1	1	1	0	1	0	1	1	1	1	0	1	0	1	1	0	1	0	0	0	1	0	0	0	0	0	0	0	0	0	0	0	0	0	0	0	0	0	0	0	0	0	0	0
Solyc09g089820.1.1	1	1	1	1	1	1	1	1	0	1	0	1	1	0	0	0	1	0	1	1	0	1	1	0	0	1	0	0	0	0	0	0	0	0	0	0	0	0	0	0	0	0	0	0	0	0	0	0	0
LOC Os03g64280.1	1	1	1	1	1	1	1	0	0	1	0	1	1	1	0	0	1	1	1	0	0	1	0	0	0	1	0	0	0	0	0	0	0	0	0	0	0	0	0	0	0	0	0	0	0	0	0	0	0
LOC Os03g48430.1	1	1	1	1	1	1	1	1	0	1	0	1	1	1	0	0	1	1	1	1	0	1	1	0	0	1	0	0	0	0	0	0	0	0	0	0	1	0	0	0	0	0	0	0	0	0	0	0	0
LOC Os08g30080.1	1	1	1	1	1	1	1	0	0	1	0	1	1	0	0	0	1	1	1	0	0	1	0	0	0	1	0	0	0	0	0	0	0	0	0	0	1	0	0	0	0	0	0	0	0	0	0	0	0
LOC Os08g30100.1	1	1	1	1	1	1	1	1	0	1	0	1	1	1	0	0	1	1	1	1	0	1	0	0	0	1	0	0	0	0	0	0	0	0	0	0	1	0	0	0	0	0	0	0	0	0	0	0	0
LOC Os08g30150.1	1	1	1	1	1	1	0	0	0	0	0	1	1	1	0	0	1	1	1	0	0	0	0	0	0	1	0	0	0	0	0	0	0	0	0	0	1	0	0	0	0	0	0	0	0	0	0	0	0
LOC Os08g30210.1	1	1	1	1	1	1	1	0	0	1	0	1	1	1	0	0	1	1	1	0	0	1	0	0	0	1	0	0	0	0	0	0	0	0	0	0	1	0	0	0	0	0	0	0	0	0	0	0	0
Solyc04g007980.2.1	1	1	1	1	1	1	1	1	0	1	0	1	1	1	1	1	1	1	1	1	0	1	0	0	0	0	0	0	0	0	0	0	0	0	0	0	0	0	0	0	0	0	0	0	0	0	0	0	0
LOC Os01g35230.1	1	1	1	1	1	1	1	1	0	1	0	1	1	1	1	0	1	1	0	0	0	1	0	0	0	1	0	0	0	0	0	0	0	0	0	0	0	0	0	0	0	0	0	0	0	0	0	0	0
LOC Os06g14390.1	1	1	1	1	1	1	1	1	0	1	0	1	1	0	1	0	1	1	1	1	0	1	0	0	0	1	0	0	0	0	0	0	0	0	0	0	0	0	0	0	0	0	0	0	0	0	0	0	0
LOC Os06g14400.1	1	1	1	1	1	1	1	1	0	1	0	1	1	1	1	0	1	1	1	1	0	1	0	0	0	1	0	0	0	0	0	0	0	0	0	0	0	0	0	0	0	0	0	0	0	0	0	0	0
AT5G12270.1	1	1	1	1	1	1	0	0	1	1	0	1	1	1	1	1	1	1	1	0	0	0	0	0	0	0	0	0	0	0	0	0	0	0	0	0	0	0	0	0	0	0	0	0	0	0	0	0	0
Solyc11g072120.1.1	0	1	1	1	1	1	1	1	0	0	0	1	0	1	1	0	1	1	0	0	0	0	0	0	0	0	0	0	0	0	0	0	0	0	0	0	0	0	0	0	0	0	0	0	0	0	0	0	0
Solyc11g072130.1.1	0	1	1	1	1	1	1	1	0	0	0	1	0	1	1	0	1	1	0	0	0	0	0	0	0	0	0	0	0	0	0	0	0	0	0	0	0	0	0	0	0	0	0	0	0	0	0	0	0
Solyc11g072110.1.1	1	1	1	1	1	1	1	1	1	1	0	1	1	1	1	1	1	1	0	0	0	0	0	0	0	0	0	0	0	0	0	0	0	0	0	0	0	0	0	0	0	0	0	0	0	0	0	0	0
Solyc11g044810.1.1	1	0	1	1	0	0	1	0	1	1	0	1	1	0	0	1	1	0	0	0	0	0	0	0	0	0	0	0	0	1	0	0	0	0	0	0	0	0	0	0	0	0	0	0	0	0	0	0	0
Solyc11g044830.1.1	0	1	1	1	1	0	0	0	0	0	0	0	0	0	0	0	0	0	0	0	0	0	0	0	0	0	0	0	0	0	0	0	0	0	0	0	0	0	0	0	0	0	0	0	0	0	0	0	0
Solyc11g072100.1.1	1	1	1	1	1	1	1	0	1	1	0	1	1	1	0	1	1	1	0	0	0	0	0	0	0	0	0	0	0	0	0	0	0	0	0	0	0	0	0	0	0	0	0	0	0	0	0	0	0
Solyc01g044560.1.1	0	1	0	1	1	1	0	1	0	0	0	0	0	1	1	0	0	1	0	0	0	0	0	0	0	0	0	0	0	0	0	0	0	0	0	0	0	0	0	0	0	0	0	0	0	0	0	0	0
Solyc10g028540.1.1	0	1	0	1	1	1	0	1	0	0	0	0	0	1	1	0	0	1	0	0	0	0	0	0	0	0	0	0	0	0	0	0	0	0	0	0	0	0	0	0	0	0	0	0	0	0	0	0	0
Solyc10g026520.1.1	1	1	1	1	1	1	1	1	1	1	0	1	1	0	1	1	1	0	1	0	0	0	0	0	0	0	0	0	0	0	0	0	0	0	0	0	0	0	0	0	0	0	0	0	0	0	0	0	0
Solyc11g045520.1.1	1	1	1	1	1	1	1	1	0	0	0	1	1	1	1	1	1	1	0	0	0	1	0	0	0	0	0	0	0	0	0	0	0	0	0	0	0	0	0	0	0	0	0	0	0	0	0	0	0
AT3G12900.1	1	1	1	1	1	1	0	1	1	0	0	1	1	1	1	1	1	1	1	0	0	0	0	0	0	0	0	0	0	0	0	0	0	0	0	0	0	0	0	0	0	0	0	0	0	0	0	0	0
AT1G55290.1	1	1	1	1	1	1	1	1	1	1	0	1	1	1	1	1	1	1	1	0	0	0	0	0	0	0	0	0	0	0	0	0	0	0	0	0	0	0	0	0	0	0	0	0	0	0	0	0	0
AT3G13610.1	1	1	1	1	1	1	1	1	1	1	0	1	1	1	1	1	1	1	1	0	0	0	0	0	0	0	0	0	0	0	0	0	0	0	0	0	0	0	0	0	0	0	0	0	0	0	0	0	0
Solyc11g007890.1.1	1	1	1	1	1	1	1	1	1	1	1	1	0	1	1	1	0	0	0	0	0	0	0	0	0	0	0	0	0	0	0	0	0	0	0	0	0	0	0	0	0	0	0	0	0	0	0	0	0
Solyc09g008560.2.1	1	1	1	1	1	1	1	1	1	1	1	1	1	0	1	1	0	0	1	0	0	0	0	0	0	0	0	0	0	0	0	0	0	0	0	0	0	0	0	0	1	0	1	0	0	0	0	0	0
AT2G36690.1	1	1	1	1	1	1	0	1	1	1	1	1	0	0	1	1	0	0	1	0	0	0	0	0	0	0	0	0	0	0	0	0	0	0	0	0	0	0	0	0	0	0	0	0	0	0	0	0	0
AT2G06960.1	0	0	1	0	1	1	0	1	0	0	0	0	0	0	1	0	0	0	0	0	0	0	0	0	0	0	0	0	0	0	0	0	0	0	0	0	0	0	0	0	0	0	0	0	0	0	0	0	0
LOC Os08g44590.1	1	1	1	1	1	1	1	1	1	1	1	1	0	0	1	1	0	0	1	0	0	0	0	0	0	0	0	0	0	0	0	0	0	0	0	0	0	0	0	0	0	0	0	0	0	0	0	0	0
LOC Os09g39720.1	1	1	1	1	1	1	1	1	1	1	1	1	0	0	1	1	0	0	1	0	0	0	0	0	0	0	0	0	0	0	0	0	0	0	0	0	0	0	0	0	0	0	0	0	0	0	0	0	0
AT2G44800.1	1	1	1	1	1	1	1	0	1	1	1	0	0	1	1	1	0	0	1	0	0	0	0	0	0	0	1	0	0	0	0	0	0	0	0	0	0	0	0	0	1	0	0	0	0	0	0	0	0
AT3G60290.1	1	1	1	1	1	1	1	0	1	1	1	0	0	1	1	1	0	0	1	0	0	0	0	0	0	0	1	0	0	0	0	0	0	1	0	0	0	0	0	0	1	0	0	0	0	0	0	0	0
Solyc01g090140.1.1	0	1	1	1	1	1	0	0	0	1	0	0	0	1	1	1	0	0	0	0	0	0	0	0	0	0	0	0	0	0	0	0	0	0	0	0	0	0	0	0	0	0	0	0	0	0	0	0	0
AT5G07480.1	0	1	1	1	1	1	1	0	1	1	1	0	0	1	1	1	0	0	1	0	0	0	0	0	0	0	1	0	0	0	0	0	0	0	0	0	0	0	0	0	0	0	0	0	0	0	0	0	0
LOC Os04g57180.1	1	1	0	1	1	1	1	0	1	1	1	0	0	1	1	0	0	0	1	0	0	0	0	1	0	0	0	0	0	0	0	0	0	0	0	0	0	0	0	0	0	0	0	0	0	0	0	0	0
LOC Os04g57160.1	1	1	1	1	1	1	1	0	1	1	1	0	0	1	1	0	0	0	1	0	0	0	0	0	0	0	0	0	0	0	0	0	0	0	0	0	0	0	0	0	1	0	0	0	0	0	0	0	0
Solyc08g006770.2.1	1	1	1	1	1	1	1	1	1	1	0	1	0	1	0	0	0	1	1	0	0	0	0	0	0	0	1	0	0	0	0	0	0	0	0	0	0	0	0	0	0	0	0	0	0	0	0	0	0
Solyc01g105660.2.1	1	1	1	1	0	1	1	1	1	1	0	1	0	1	1	0	0	1	1	0	0	0	0	0	0	0	1	0	0	0	0	0	0	0	0	0	0	0	0	0	0	0	0	0	0	0	0	0	0
Solyc01g105650.2.1	1	1	1	1	1	1	1	1	1	1	1	1	0	1	0	0	0	1	1	0	0	0	0	0	0	0	0	0	0	0	0	0	0	1	0	0	0	0	0	0	0	0	0	0	0	0	1	0	0
LOC Os08g37456.1	1	1	0	1	0	1	1	1	1	1	0	0	0	1	1	0	0	0	0	0	0	0	0	1	0	0	0	0	0	0	0	0	0	0	0	0	0	0	0	0	0	0	0	0	0	0	0	0	0
Solyc07g054870.2.1	1	1	1	1	1	1	1	1	1	1	1	1	1	1	1	1	0	0	1	0	0	0	0	0	0	0	0	0	0	0	0	0	0	0	0	0	0	0	0	0	1	0	0	0	0	1	1	0	0
Solyc07g054930.2.1	1	1	1	1	1	1	1	1	1	1	1	1	1	1	1	1	0	0	1	0	0	0	0	0	0	0	0	0	0	0	0	0	0	0	0	0	0	0	0	0	1	0	0	0	0	1	1	0	0
Solyc07g054940.1.1	1	1	1	1	1	1	1	1	1	1	1	1	1	1	0	1	0	0	1	0	0	0	0	0	0	0	0	0	0	0	0	0	0	0	0	0	0	0	0	0	1	0	0	0	0	1	1	0	0
Solyc07g054920.1.1	1	1	1	1	1	1	1	1	1	1	1	1	1	1	1	0	0	0	1	0	0	0	0	0	0	0	0	0	0	0	0	0	0	0	0	0	0	0	0	0	1	0	0	0	0	0	1	0	0
SlDLO1	1	1	1	1	1	1	1	1	1	1	1	1	0	1	0	1	0	1	1	0	0	0	0	0	0	0	0	0	0	0	0	0	0	0	0	0	0	0	0	0	1	0	0	0	0	0	0	0	0
SlDLO2	1	1	1	1	1	1	1	1	0	1	1	1	0	1	1	1	0	1	0	0	0	0	0	0	0	0	0	0	0	0	0	0	0	0	0	0	0	0	0	0	1	0	0	0	0	0	0	0	0
AtDMR6	1	1	1	1	1	1	1	1	1	1	1	1	0	1	0	1	0	1	1	0	0	0	0	0	0	0	0	0	0	0	0	0	0	0	0	0	0	0	0	0	1	0	0	0	0	0	1	0	0
OsDLO1	1	1	1	1	1	1	1	1	1	1	1	1	0	1	1	1	0	1	1	0	0	0	0	0	0	0	0	0	0	0	0	0	0	0	0	0	0	0	0	0	1	0	0	0	0	0	1	0	0
OsDLO3	1	1	1	1	1	1	1	1	1	1	1	1	0	1	1	1	0	1	1	0	0	0	0	0	0	0	0	0	0	0	0	0	0	0	0	0	0	0	0	0	1	0	0	0	0	0	1	0	0
OsF3H	1	1	1	1	1	1	1	1	1	1	1	1	0	1	1	1	0	1	1	0	0	0	0	0	0	0	0	0	0	0	0	0	0	0	0	0	0	0	0	0	1	0	0	0	0	0	0	0	0
OsDLO2	1	1	1	1	1	1	1	1	1	1	1	1	0	1	1	1	0	1	1	0	0	0	0	0	0	0	0	0	0	0	0	0	0	0	0	0	0	0	0	0	1	0	0	0	0	0	0	0	0
AtDLO1	1	1	1	1	1	1	1	1	1	1	1	1	0	1	0	1	0	1	1	0	0	0	0	0	0	0	0	0	0	0	0	0	0	0	0	0	0	0	0	0	1	0	0	0	0	0	0	0	0
AtDLO2	1	1	1	1	1	1	1	1	1	1	1	1	0	1	1	1	0	0	1	0	0	0	0	0	0	0	0	0	0	0	0	0	0	0	0	0	0	0	0	0	1	0	0	0	0	0	1	0	0
LOC Os07g07410.1	0	1	1	1	1	1	1	1	1	1	1	1	0	1	1	1	0	0	0	0	0	0	0	0	0	0	0	0	0	0	0	0	0	0	0	0	0	0	0	0	0	0	0	0	0	0	1	0	0
Solyc09g066310.2.1	1	1	1	1	1	1	1	1	0	1	1	1	0	1	1	1	0	0	0	0	0	0	0	0	0	0	0	0	0	0	0	0	0	0	0	0	0	0	0	0	0	0	0	0	0	0	0	0	0
Solyc09g066320.1.1	1	1	1	1	1	1	1	1	0	1	1	0	0	1	1	0	0	0	0	0	0	0	0	0	0	0	0	0	0	0	0	0	0	0	0	0	0	0	0	0	0	0	0	0	0	0	0	0	0
Solyc02g070080.2.1	1	1	1	1	1	1	1	1	1	0	1	1	0	1	1	1	0	0	1	0	0	0	0	0	0	0	0	0	0	0	0	0	0	0	0	0	0	0	0	0	0	0	0	0	0	0	1	0	0
Solyc06g083910.2.1	1	1	1	1	1	1	1	1	1	0	1	1	0	1	1	1	0	0	1	0	0	0	0	0	0	0	0	0	0	0	0	0	0	0	0	0	0	0	0	0	0	0	0	0	0	0	1	0	0
Solyc11g010400.1.1	1	1	1	1	1	1	1	1	1	1	1	1	0	1	0	1	0	0	0	0	0	0	0	0	0	0	0	0	0	0	0	0	0	0	0	0	0	0	0	0	0	0	0	0	0	0	1	0	0
Solyc11g010410.1.1	1	1	1	1	1	1	1	1	1	1	1	0	0	1	0	1	0	0	1	0	0	0	0	0	0	0	0	0	0	0	0	0	0	0	0	0	0	0	0	0	0	0	0	0	0	0	1	0	0
Solyc07g043420.2.1	1	1	1	0	1	1	1	1	1	1	1	0	0	0	1	1	0	0	0	0	0	0	0	0	0	0	0	0	0	0	0	0	0	0	0	0	0	0	0	0	0	0	0	0	0	0	1	0	0
Solyc10g018190.1.1	1	1	1	1	1	1	1	0	1	1	1	0	0	0	1	1	0	0	0	0	0	0	0	0	0	0	0	0	0	0	0	0	0	0	0	0	0	0	0	0	0	0	0	0	0	0	1	0	0
Solyc11g072200.1.1	1	1	1	1	1	1	1	0	1	1	1	1	0	1	1	1	0	0	0	0	0	0	0	0	0	0	0	0	0	0	0	0	0	0	0	0	0	0	0	0	0	0	0	0	0	0	1	0	0
Solyc06g073580.2.1	1	1	1	1	1	1	1	0	1	1	1	1	0	1	1	1	0	0	0	0	0	0	0	0	0	0	0	0	0	0	0	0	0	0	0	0	0	0	0	0	0	0	0	0	0	0	0	0	0
LOC Os06g06720.1	1	1	1	1	1	1	1	1	1	1	1	1	0	1	1	1	0	1	0	0	1	0	0	0	0	0	0	0	0	0	0	0	0	0	0	0	0	0	0	0	1	0	0	0	0	0	1	0	0
AT4G16330.2	1	1	1	1	1	1	1	1	1	1	0	1	0	1	0	0	0	1	0	0	1	0	0	0	0	0	1	0	0	0	0	0	0	0	0	0	0	0	0	0	1	0	0	0	0	0	0	0	0
Solyc10g005120.1.1	1	1	1	1	1	1	1	1	1	1	1	1	0	0	0	1	0	1	0	0	1	0	0	0	0	0	0	0	0	0	0	0	0	0	0	0	0	0	0	0	1	0	0	0	0	0	1	0	0
LOC Os04g56700.1	1	1	1	1	1	1	1	1	1	1	1	0	0	0	0	1	0	0	0	0	0	0	0	0	0	0	1	0	0	0	0	0	0	0	0	0	0	0	0	0	0	0	0	0	0	0	0	0	0
Solyc02g083860.2.1	1	1	1	1	1	1	1	1	1	1	1	0	0	0	0	1	0	0	0	0	0	0	0	0	0	0	1	0	0	0	0	0	0	0	0	0	0	0	0	0	0	0	0	0	0	0	0	0	0
AT3G51240.1	1	1	1	1	1	1	1	1	1	1	1	0	0	0	0	1	0	0	0	0	0	0	0	0	0	0	1	0	0	0	0	0	0	0	0	0	0	0	0	0	0	0	0	0	0	0	0	0	0
AT4G22880.1	1	1	1	1	1	1	1	1	1	1	1	1	0	0	1	1	0	0	0	0	1	0	0	0	0	0	0	0	0	0	0	0	0	0	0	0	0	0	0	0	0	0	0	0	0	0	1	0	0
AT4G22870.1	0	1	0	0	1	1	0	1	0	0	0	0	0	0	1	0	0	0	0	0	0	0	0	0	0	0	0	0	0	0	0	0	0	0	0	0	0	0	0	0	0	0	0	0	0	0	0	0	0
Solyc08g080040.2.1	1	1	1	1	1	1	1	1	1	1	1	1	0	0	1	1	0	0	1	0	1	0	0	0	0	0	0	0	0	0	0	0	0	0	0	0	0	0	0	0	0	0	0	0	0	0	0	0	0
LOC Os01g27490.1	1	1	1	1	1	1	1	1	1	1	1	1	0	0	0	1	0	0	0	0	1	0	0	0	0	0	0	0	0	0	0	0	0	0	0	0	0	0	0	0	0	0	0	0	0	0	0	0	0
LOC Os06g42130.1	1	1	1	1	1	1	1	1	1	1	1	1	0	0	0	1	0	0	0	0	1	0	0	0	0	0	0	0	0	0	0	0	0	0	0	0	0	0	0	0	0	0	0	0	0	0	0	0	0
LOC Os02g52840.1	1	1	1	1	1	1	1	1	1	1	1	1	0	0	1	1	0	0	0	0	1	0	0	0	0	0	0	0	0	0	0	0	0	0	0	0	0	0	0	0	0	0	0	0	0	0	0	0	0
Solyc11g013110.1.1	1	1	1	1	1	1	1	1	0	1	1	1	0	0	1	1	0	0	0	0	1	0	0	0	0	0	0	0	0	0	0	0	0	0	0	0	0	0	0	0	0	0	0	0	0	0	0	0	0
AT5G08640.1	1	1	1	1	1	1	1	1	1	1	1	1	0	0	1	1	0	1	0	0	1	0	0	0	0	0	0	0	0	0	0	0	0	0	0	0	0	0	0	0	0	0	0	0	0	0	1	0	0
AT5G63590.1	1	1	1	1	1	1	1	1	1	1	1	0	0	1	1	0	1	0	0	0	0	0	0	0	0	0	0	0	0	0	0	0	0	0	0	0	0	0	0	0	0	0	0	0	0	0	0	0	0
AT5G63595.1	1	1	1	1	1	1	1	1	1	1	1	0	0	0	0	0	0	0	0	0	0	0	0	0	0	0	0	0	0	0	0	0	0	0	0	0	0	0	0	0	0	0	0	0	0	0	0	0	0
AT5G63580.1	1	0	1	1	1	0	1	1	1	1	1	0	0	0	0	0	0	1	0	0	0	0	0	0	0	0	0	0	0	0	0	0	0	0	0	0	0	0	0	0	0	0	0	0	0	0	0	0	0
AT5G63600.1	1	1	1	1	1	1	1	1	1	1	1	1	0	1	1	0	0	0	0	0	0	0	0	0	0	0	0	0	0	0	0	0	0	0	0	0	0	0	0	0	0	0	0	0	0	0	1	0	0
AT5G43935.1	1	1	0	1	1	1	1	1	1	1	1	0	0	1	1	0	0	0	0	0	0	0	0	1	0	0	1	0	0	0	0	0	0	0	0	0	0	0	0	0	0	0	0	0	0	0	1	0	0
LOC Os06g07932.1	1	1	1	1	1	1	1	1	1	1	1	1	0	1	1	1	0	0	0	0	1	0	0	0	0	0	0	0	0	0	0	0	0	0	0	0	0	0	0	0	0	0	0	0	0	0	1	0	0
LOC Os06g08032.1	1	1	1	1	1	1	1	1	1	1	1	1	0	1	1	1	0	0	0	0	1	0	0	0	0	0	0	0	0	0	0	0	0	0	0	0	0	0	0	0	0	0	0	0	0	0	1	0	0
LOC Os02g17940.1	1	1	1	1	1	1	1	1	1	1	1	1	0	1	1	1	0	0	0	0	1	0	0	0	0	0	0	0	0	0	0	0	0	0	0	0	0	0	0	0	0	0	0	0	0	0	1	0	0
LOC Os02g21550.1	0	1	1	1	0	1	0	1	1	0	1	1	0	0	0	0	0	0	0	0	1	0	0	0	0	0	0	0	0	0	0	0	0	0	0	0	0	0	0	0	0	0	0	0	0	0	0	0	0
LOC Os06g08060.1	1	1	1	1	0	1	0	1	1	1	1	1	0	0	0	0	0	0	0	0	1	0	0	0	0	0	0	0	0	0	0	0	0	0	0	0	0	0	0	0	0	0	0	0	0	0	0	0	0
LOC Os06g07941.1	0	1	1	1	1	1	1	1	1	1	0	0	0	0	1	1	0	0	0	0	1	0	0	0	0	0	0	0	0	0	0	0	0	0	0	1	0	0	0	0	0	0	0	0	0	0	0	0	0
LOC Os06g08041.1	0	1	1	1	1	1	1	1	1	1	0	0	0	0	1	1	0	0	0	0	1	0	0	0	0	0	0	0	0	0	0	0	0	0	0	1	0	0	0	0	0	0	0	0	0	0	0	0	0
LOC Os06g08023.1	1	1	1	1	1	1	0	1	1	1	1	1	0	0	1	1	0	0	0	0	1	0	0	0	0	0	0	0	0	1	0	0	0	0	0	0	0	0	0	0	0	0	0	0	0	0	1	0	0
LOC Os06g07923.2	0	1	0	0	1	1	0	1	0	0	0	0	0	0	1	0	0	1	0	0	0	0	0	0	0	0	0	0	0	0	0	0	0	0	0	0	0	0	0	0	0	0	0	0	0	0	0	0	0
LOC Os06g08014.1	1	0	1	1	1	1	1	1	1	1	0	1	0	0	1	1	1	0	0	0	1	0	0	0	0	0	0	0	0	0	0	0	0	0	0	0	0	0	0	0	0	0	0	0	0	0	1	0	0
LOC Os06g07914.1	1	0	1	1	1	0	1	1	1	1	0	1	0	0	0	1	1	0	0	0	1	0	0	0	0	0	0	0	0	0	0	0	0	0	0	0	0	0	0	0	0	0	0	0	0	0	1	0	0
Solyc06g068270.2.1	1	1	1	1	1	1	0	0	1	1	1	1	0	0	1	0	0	0	0	0	0	0	0	0	0	0	0	0	0	0	0	0	0	0	0	0	0	0	0	0	0	0	0	0	0	0	1	0	0
Solyc06g068260.1.1	0	0	1	1	1	0	0	0	0	0	0	0	0	0	0	0	0	0	0	0	0	0	0	0	0	0	0	0	0	0	0	0	0	0	0	0	0	0	0	0	0	0	0	0	0	0	0	0	0
Solyc10g076840.1.1	1	1	1	1	1	1	1	1	1	1	1	1	0	0	1	0	0	0	0	0	1	0	0	0	0	0	0	0	0	0	0	0	0	0	0	0	0	0	0	0	0	0	0	0	0	0	0	0	0
Solyc10g086780.1.1	1	1	1	1	1	1	1	1	1	1	1	1	0	0	1	0	0	0	0	0	1	0	0	0	0	0	0	0	0	0	0	0	0	0	0	0	0	0	0	0	0	0	0	0	0	0	0	0	0
Solyc07g045040.2.1	1	1	1	1	1	1	1	1	1	1	1	1	0	0	1	0	0	0	0	0	1	0	0	0	0	0	0	0	0	0	0	0	0	0	0	0	0	0	0	0	0	0	0	0	0	0	1	0	0
AT1G49390.1	1	1	1	1	1	1	1	1	1	1	1	1	0	0	1	0	0	0	0	0	1	0	0	0	0	0	0	0	0	0	0	0	0	0	0	0	0	0	0	0	0	0	0	0	0	0	0	0	0
AT5G54000.1	1	1	1	1	1	1	1	1	1	1	1	1	0	0	1	0	0	0	0	0	1	0	0	0	0	0	0	0	0	0	0	0	0	0	0	0	0	0	0	0	0	0	0	0	0	0	0	0	0
AT5G20400.1	1	1	1	1	1	1	0	1	1	1	1	1	0	0	1	0	0	0	0	0	1	0	0	0	0	0	1	0	0	0	0	0	0	0	0	0	0	0	0	0	0	0	0	0	0	0	0	0	0
AT5G20550.1	1	1	1	1	0	1	0	1	1	1	1	1	0	0	1	1	0	0	0	0	1	0	0	0	0	0	0	0	0	0	0	0	0	0	0	0	0	0	0	0	0	0	0	0	0	0	1	0	0
OsLBO1	1	1	1	1	1	1	1	1	1	1	1	1	0	1	1	1	0	1	0	0	1	0	0	0	0	0	0	0	0	0	0	0	0	0	0	0	0	0	0	0	0	0	0	0	0	0	1	0	1
SlLBO1	1	1	1	1	1	1	1	1	1	1	1	1	0	1	1	1	0	1	0	0	1	0	0	0	0	0	0	0	0	0	0	0	0	0	0	0	1	0	0	0	0	0	0	0	0	0	1	0	1
AtLBO1	1	1	1	1	1	1	1	1	1	1	1	1	0	1	1	1	0	1	0	0	1	0	0	0	0	0	0	0	0	0	0	0	1	0	0	0	0	0	0	0	0	0	0	0	0	0	0	0	1
LOC Os10g40960.1	0	1	1	1	1	1	0	1	0	0	0	0	0	1	1	0	0	1	0	0	0	0	0	0	0	0	0	0	0	0	0	0	0	0	0	0	0	0	0	0	0	0	0	0	0	0	0	0	0
LOC Os11g03510.1	0	0	1	1	0	0	1	1	0	0	0	0	0	0	0	0	0	0	0	0	0	0	0	0	0	0	0	0	0	0	0	0	0	0	0	0	0	0	0	0	0	0	0	0	0	0	0	0	0
LOC Os10g40934.1	0	1	1	1	1	1	1	1	1	1	1	1	0	1	1	1	0	1	0	0	1	0	0	0	0	0	0	0	0	0	0	0	1	0	0	0	0	0	0	0	0	0	0	0	0	0	0	0	0
LOC Os10g40880.1	1	1	1	1	1	1	1	1	1	1	1	1	0	1	1	1	0	1	0	0	1	0	0	0	0	0	0	0	0	0	0	0	1	0	0	0	0	0	0	0	1	0	0	0	0	0	0	0	0
LOC Os10g40900.1	1	1	0	1	1	1	1	1	1	1	1	1	0	1	1	1	0	1	0	0	1	0	0	0	0	0	0	0	0	0	0	0	1	0	0	0	0	0	0	0	0	0	0	0	0	0	0	0	0
LOC Os10g41020.1	1	1	1	1	1	1	1	1	1	1	1	1	0	0	1	1	0	1	0	0	1	0	0	0	0	0	0	0	0	0	0	0	0	0	0	0	0	0	0	0	0	0	0	0	0	0	0	0	0
LOC Os03g32470.1	1	1	1	1	1	1	1	1	1	1	1	1	0	0	0	1	0	1	0	0	1	0	0	0	0	0	0	0	0	0	0	0	0	0	0	0	0	0	0	0	0	0	0	0	0	0	0	0	0
LOC Os09g18450.1	1	1	1	1	1	1	1	1	1	1	1	1	0	0	0	0	0	0	0	0	1	0	0	0	0	0	0	0	0	0	0	0	0	0	0	0	0	0	0	0	0	0	0	0	0	0	0	0	0
LOC Os09g18520.1	1	1	1	1	1	1	0	1	0	1	0	0	0	0	0	1	0	0	0	0	0	0	0	0	0	0	0	0	0	0	0	0	0	0	0	0	0	0	0	0	0	0	0	0	0	0	0	0	0
LOC Os09g18470.1	0	1	1	1	1	1	1	1	0	1	0	0	0	0	0	1	0	0	0	0	0	0	0	0	0	0	1	0	0	0	0	0	0	0	0	0	0	0	0	0	0	0	0	0	0	0	0	0	0
LOC Os03g63900.1	1	1	0	1	1	1	1	1	1	1	0	1	0	1	1	0	0	1	0	0	1	0	0	1	0	0	1	0	0	0	0	0	1	0	0	0	0	0	0	0	0	0	0	0	0	0	0	0	0
LOC Os01g25010.1	1	0	1	1	1	1	1	1	1	1	1	1	0	0	1	1	0	1	0	0	1	0	0	0	0	0	0	0	0	0	0	0	1	0	0	0	0	0	0	0	0	0	0	0	0	0	0	0	1
LOC Os01g24980.1	1	1	1	1	1	1	0	1	1	1	1	1	0	1	1	1	0	1	0	0	1	0	0	0	0	0	0	0	0	0	0	0	1	0	0	0	0	0	0	0	0	0	0	0	0	0	0	0	1
AT4G25310.1	1	1	1	1	1	1	1	1	1	1	1	1	0	1	1	1	0	1	0	0	1	0	0	0	0	0	0	0	0	0	0	0	1	0	0	0	0	0	0	0	0	0	0	0	0	0	0	0	0
AT4G25300.1	1	1	1	1	1	1	1	1	1	1	1	1	0	1	1	1	0	1	0	0	1	0	0	0	0	0	0	0	0	0	0	0	1	0	0	0	0	0	0	0	0	0	0	0	0	0	0	0	0
AT1G78550.1	1	1	1	1	1	1	0	1	1	1	0	1	0	1	1	1	0	1	0	0	1	0	0	0	0	0	1	0	0	0	0	0	1	0	0	0	0	0	0	0	0	0	0	0	0	0	0	0	1
AT1G17020.1	1	1	1	1	1	1	1	1	1	1	1	1	0	0	1	1	0	1	0	0	1	0	0	0	0	0	0	0	0	0	0	0	1	0	0	0	0	0	0	0	0	0	0	0	0	0	1	0	1
AT1G17010.1	1	1	1	1	1	1	1	1	1	1	1	1	0	0	1	1	0	1	0	0	1	0	0	0	0	0	0	0	0	0	0	0	1	0	0	0	0	0	0	0	0	0	0	0	0	0	0	0	1
Solyc02g071360.2.1	1	1	1	1	1	1	1	1	1	1	0	1	0	0	1	1	0	1	0	0	1	0	0	0	0	0	1	0	0	0	0	0	1	0	0	0	0	0	0	0	0	0	0	0	0	0	0	0	1
Solyc02g071430.2.1	1	1	1	1	1	1	1	1	1	1	0	1	0	0	1	1	1	1	0	0	1	0	0	0	0	0	0	0	0	0	0	0	1	0	0	0	0	0	0	0	0	0	0	0	0	0	1	0	0
Solyc02g071400.2.1	0	0	1	1	1	1	1	1	1	1	0	1	0	0	1	1	2	0	0	0	1	0	0	0	0	0	0	0	0	0	0	0	1	0	0	0	0	0	0	0	0	0	0	0	0	0	1	0	0
Solyc08g062370.2.1	0	1	1	1	1	1	0	1	0	0	1	0	0	0	0	0	0	1	0	0	0	0	0	0	0	0	0	0	0	0	0	0	0	0	0	0	0	0	0	0	0	0	0	0	0	0	0	0	1
Solyc02g071380.2.1	1	1	1	1	1	1	1	1	1	1	0	1	0	0	0	1	0	1	0	0	1	0	0	0	0	0	1	0	0	0	0	0	1	0	0	0	0	0	0	0	0	0	0	0	0	0	0	0	1
Solyc02g071390.1.1	0	1	0	0	1	1	0	0	0	0	0	0	0	0	1	0	0	0	0	0	0	0	0	0	0	0	0	0	0	0	0	0	0	0	0	0	0	0	0	0	0	0	0	0	0	0	0	0	0
Solyc02g071490.2.1	1	1	1	1	1	1	1	1	1	1	0	1	0	0	1	1	1	1	0	0	1	0	0	0	0	0	0	0	0	0	0	0	1	0	0	0	0	0	0	0	0	0	0	0	0	0	1	0	1
Solyc02g071500.2.1	1	1	1	1	1	1	1	1	1	1	1	1	0	0	0	1	0	1	0	0	1	0	0	0	0	0	1	0	0	0	0	0	1	0	0	0	0	0	0	0	0	0	0	0	0	0	0	0	1
Solyc02g071480.2.1	1	1	1	1	1	1	0	1	1	1	0	1	0	0	1	1	0	0	0	0	1	0	0	0	0	0	0	0	0	0	0	0	1	0	0	0	0	0	0	0	0	0	0	0	0	0	0	0	1
Solyc02g071440.2.1	1	1	1	1	1	1	1	1	1	1	0	1	0	0	1	1	0	1	0	0	1	0	0	0	0	0	1	0	0	0	0	0	1	0	0	0	0	0	0	0	0	0	0	0	0	0	0	0	1
Solyc02g071470.2.1	1	1	1	1	1	1	1	1	1	1	1	1	0	0	0	1	1	1	0	0	1	0	0	0	0	0	0	0	0	0	0	0	1	0	0	0	0	0	0	0	0	0	0	0	0	0	0	0	1
Solyc02g071410.2.1	1	1	1	1	1	1	1	1	1	1	0	1	0	0	1	1	1	1	0	0	1	0	0	0	0	0	0	0	0	0	0	0	1	0	0	0	0	0	0	0	0	0	0	0	0	0	0	0	1
Solyc02g071450.2.1	1	1	1	1	1	1	1	1	1	1	0	1	0	0	1	1	0	1	0	0	1	0	0	0	0	0	1	0	0	0	0	0	1	0	0	0	0	0	0	0	0	0	0	0	0	0	0	0	1
AtJOX4	1	1	1	1	1	1	1	1	1	1	1	1	0	1	1	1	0	1	0	0	1	0	0	0	0	0	0	0	0	0	0	0	0	0	0	0	0	1	0	0	0	0	0	0	0	0	1	0	0
SlJOX3	1	1	1	1	1	1	1	1	1	1	0	1	0	1	1	1	1	1	0	0	1	0	0	0	0	0	0	0	0	0	0	0	0	0	0	0	0	1	0	0	0	0	0	0	0	0	1	0	0
SlJOX2	1	1	1	1	1	1	1	1	1	1	0	1	0	1	1	1	1	1	0	0	1	0	0	0	0	0	0	0	0	0	0	0	0	0	0	0	0	1	0	0	0	0	0	0	0	0	1	0	0
AtJOX2	1	1	1	1	1	1	1	1	1	1	1	1	0	1	1	1	0	0	0	0	1	0	0	0	0	0	0	0	0	0	0	0	0	0	0	0	0	1	0	0	0	0	0	0	0	0	1	0	0
AtJOX1	1	1	1	1	1	1	1	1	1	1	1	1	0	1	1	1	0	0	0	0	1	0	0	0	0	0	0	0	0	0	0	0	0	0	0	0	0	1	0	0	0	0	0	0	0	0	1	0	0
AtJOX3	1	1	1	1	1	1	1	1	1	1	0	1	0	1	1	1	0	0	0	0	1	0	0	0	0	0	1	0	0	0	0	0	0	0	0	0	0	1	0	0	0	0	0	0	0	0	1	0	0
SlJOX1	1	1	1	1	1	1	1	1	1	1	0	1	0	1	1	1	1	0	0	0	1	0	0	0	0	0	0	0	0	0	0	0	0	0	0	0	0	1	0	0	0	0	0	0	0	0	1	0	0
OsJOX4	1	1	1	1	1	1	1	1	1	1	1	1	0	1	1	1	0	1	0	0	1	0	0	0	0	0	0	0	0	0	0	0	0	0	0	0	0	1	0	0	0	0	0	0	0	0	1	0	0
OsJOX1	1	1	1	1	1	1	1	1	1	1	1	1	0	1	1	1	0	1	0	0	1	0	0	0	0	0	0	0	0	0	0	0	0	0	0	0	0	1	0	0	0	0	0	0	0	0	1	0	0
OsJOX2	1	1	1	1	1	1	1	1	1	1	0	1	0	1	0	1	0	0	0	0	1	0	0	0	0	0	1	0	0	0	0	0	0	0	0	0	0	1	0	0	0	0	0	0	0	0	1	0	0
OsJOX3	1	1	1	1	1	1	1	1	1	1	0	1	0	1	1	1	0	0	0	0	1	0	0	0	0	0	1	0	0	0	1	0	0	0	0	0	0	1	0	0	0	0	0	0	0	0	1	0	0
OsACO5	1	1	1	1	1	1	1	1	0	1	1	1	0	1	0	0	0	0	0	0	0	0	0	0	1	0	0	0	0	0	0	0	0	0	0	0	0	0	0	0	0	0	0	0	0	0	1	0	0
OsACO6	0	0	1	1	1	0	1	1	0	0	1	1	0	0	0	0	0	0	0	0	0	0	0	0	0	0	0	0	0	0	1	0	0	0	0	0	0	0	0	0	0	0	0	0	0	0	0	0	0
OsACO4	1	1	1	1	1	1	1	1	0	1	1	1	0	1	0	0	0	0	0	0	0	0	0	0	1	0	0	0	0	0	0	0	0	0	0	1	1	0	0	0	0	0	0	0	0	0	1	0	0
SlACO7	1	1	1	1	1	1	1	1	0	1	1	1	0	1	1	0	0	0	0	0	0	0	0	0	1	0	0	0	0	0	1	0	0	0	0	0	0	0	0	0	0	0	0	0	0	0	1	0	0
AtACO5	1	1	1	1	1	1	1	1	0	1	0	1	0	1	0	0	1	0	0	0	0	0	0	0	1	0	0	1	0	0	1	0	0	0	0	0	0	0	0	0	0	0	0	0	0	0	0	0	0
SlACO5	1	1	1	1	0	1	1	1	0	1	0	1	0	0	0	0	0	0	0	0	0	0	0	0	1	0	0	0	0	0	1	0	0	0	0	0	0	0	1	0	0	0	0	0	0	0	1	0	0
AtACO1	1	1	1	1	1	1	1	1	0	1	0	1	0	0	0	0	0	0	0	0	0	0	0	0	1	0	1	0	0	0	1	0	0	0	0	0	0	0	1	0	0	0	0	0	0	0	1	0	0
OsACO7	1	1	1	1	0	1	1	1	0	1	0	0	0	0	0	0	1	0	0	0	0	0	0	0	1	0	0	0	0	0	0	0	0	0	0	0	0	0	0	0	0	0	0	0	0	0	1	0	0
OsACO8	1	1	1	1	0	1	1	1	0	1	0	0	0	0	0	0	0	0	0	0	0	1	0	0	1	0	0	0	0	0	1	0	0	0	0	0	0	0	1	0	0	0	0	0	0	0	0	0	0
OsACO1	1	1	1	1	1	1	1	1	0	1	0	1	0	1	1	0	0	0	0	0	0	0	0	0	1	0	1	1	0	0	1	0	0	0	0	0	0	0	1	0	0	0	0	0	0	0	0	0	0
OsACO2	1	1	1	1	1	1	1	1	0	1	0	1	0	1	1	0	0	0	0	0	0	0	0	0	1	0	1	1	0	0	1	0	0	0	0	0	0	0	1	0	0	0	0	0	0	0	0	0	0
OsACO3	0	1	1	1	1	1	1	1	0	0	0	1	0	1	0	0	0	0	0	0	0	0	0	0	1	0	1	1	0	0	1	0	0	0	0	0	0	0	1	0	0	0	0	0	0	0	0	0	0
AtACO2	1	1	1	1	1	1	1	1	0	1	0	1	0	1	0	0	0	0	0	0	0	0	0	0	1	0	1	1	0	0	1	0	0	0	0	0	0	0	1	0	0	0	0	0	0	0	0	0	0
AtACO3	1	1	1	1	1	1	1	1	0	1	0	1	0	1	0	0	0	0	0	0	0	0	0	0	1	0	1	1	0	0	1	0	0	0	0	0	0	0	1	0	0	0	0	0	0	0	0	0	0
SlACO4	1	1	1	1	1	1	1	1	0	1	0	1	0	1	1	0	0	0	0	0	0	0	0	0	1	0	1	1	0	0	1	0	0	0	0	0	0	0	1	0	0	0	0	0	0	0	0	0	0
SlACO6	1	1	1	1	1	1	1	1	0	1	0	1	0	1	1	0	0	0	0	0	0	0	0	0	1	0	1	1	0	0	1	0	0	0	0	0	0	0	1	0	0	0	0	0	0	0	0	0	0
AtACO4	1	1	1	1	1	1	1	1	0	1	0	1	0	1	1	0	0	0	0	0	0	0	0	0	1	0	1	1	0	0	1	0	0	0	0	0	0	0	1	0	0	0	0	0	0	0	0	0	0
SlACO1	1	1	1	1	1	1	1	1	0	1	0	1	0	1	1	0	0	0	0	0	0	0	0	0	1	0	1	1	0	0	1	0	0	0	0	0	0	0	1	0	0	0	0	0	0	0	0	0	0
SlACO2	1	1	1	1	1	1	1	1	0	1	0	1	0	1	1	0	0	0	0	0	0	0	0	0	1	0	1	1	0	0	1	0	0	0	0	0	0	0	1	0	0	0	0	0	0	0	0	0	0
SlACO3	1	1	1	1	1	1	1	1	0	1	0	1	0	1	1	0	0	0	0	0	0	0	0	0	1	0	1	1	0	0	1	0	0	0	0	0	0	0	1	0	0	0	0	0	0	0	0	0	0
OsGA2ox9	1	1	0	1	1	1	1	1	1	1	0	1	0	1	0	0	0	0	0	0	0	0	0	1	0	0	1	0	0	0	0	0	0	0	0	0	0	0	0	0	0	0	0	0	1	0	0	0	0
OsGA2ox6	1	1	0	1	1	1	1	1	1	1	0	1	0	1	0	0	0	0	0	0	0	0	0	1	0	0	1	0	0	0	0	0	0	0	0	0	0	0	0	0	0	0	0	0	1	0	0	0	0
OsGA2ox5	1	1	0	1	1	1	1	1	1	1	0	1	0	1	0	0	0	0	0	0	0	0	0	1	0	0	1	0	0	0	0	0	0	0	0	0	0	0	0	0	0	0	0	0	1	0	0	0	0
SlGA2ox11	1	1	0	1	1	1	0	1	1	1	0	1	0	1	0	0	0	0	0	0	0	0	0	1	0	0	1	0	0	0	0	0	0	0	0	0	0	0	0	0	0	0	0	0	1	0	0	0	0
AtGA2ox8	1	1	1	1	1	1	1	1	0	1	0	1	0	1	0	0	0	0	0	0	0	0	0	0	0	0	0	0	0	0	0	0	0	0	0	0	0	0	0	0	0	0	0	0	1	0	0	0	0
SlGA2ox10	1	1	1	1	1	1	1	1	1	1	0	1	0	1	0	0	0	0	0	0	0	0	0	0	0	0	1	0	0	0	0	0	0	0	0	0	0	0	0	0	0	0	0	0	1	0	0	0	0
SlGA2ox12	1	0	0	1	1	0	1	1	0	1	0	1	0	0	0	0	0	0	0	0	0	0	0	1	0	0	1	0	0	0	0	0	0	0	0	0	0	0	0	0	0	0	0	0	1	0	0	0	0
AtGA2ox7	1	1	0	1	1	1	0	1	1	1	0	0	0	1	0	0	0	0	0	0	0	0	0	1	0	0	1	0	0	0	0	0	0	0	0	0	0	0	0	0	0	0	0	0	1	0	0	0	0
Solyc06g082030.2.1	1	1	1	1	1	1	0	1	1	0	0	0	0	1	0	0	0	0	0	0	0	0	0	0	0	0	1	0	0	0	0	0	0	0	0	0	0	0	1	0	0	0	0	0	0	0	0	0	0
LOC Os04g33360.1	1	1	0	1	1	1	1	1	0	0	0	0	0	1	0	0	0	0	0	0	0	0	0	1	0	0	1	0	0	0	0	0	0	0	0	0	0	0	0	0	0	0	0	0	0	0	0	0	0
AT3G47190.1	1	1	0	1	1	1	1	1	1	2	1	0	0	1	0	0	0	0	0	0	0	0	0	1	0	0	1	0	0	0	0	0	0	0	0	0	0	0	0	0	0	0	0	0	0	0	0	0	0
AT5G58660.1	1	1	0	1	1	1	1	1	1	1	1	0	0	1	0	0	0	0	0	0	0	0	0	1	0	0	1	0	0	0	0	0	0	0	0	0	0	0	0	0	0	0	0	0	0	0	0	0	0
OsGA3ox1	1	1	1	1	1	1	1	1	1	1	0	0	0	1	0	0	0	0	0	0	0	0	0	0	0	0	0	0	0	1	0	0	0	0	0	0	0	0	0	1	0	0	0	0	0	0	0	0	0
OsGA3ox2	1	1	1	1	1	1	1	1	1	1	0	0	0	1	1	0	0	0	0	0	1	0	0	0	0	0	1	0	0	0	0	0	0	0	0	0	0	0	0	1	0	0	0	0	0	0	0	0	0
AtGA3ox3	1	1	1	1	1	1	1	0	1	1	0	0	0	1	0	0	0	0	0	0	1	0	0	0	0	0	1	0	0	0	0	0	0	0	0	0	0	0	0	1	0	0	0	0	0	0	0	0	0
SlGA3ox4	1	1	1	1	0	1	0	1	1	1	1	0	0	0	0	0	0	0	0	0	1	0	0	0	0	0	0	0	0	0	0	0	0	0	0	0	0	0	0	1	0	0	0	0	0	0	0	0	0
SlGA3ox3	1	1	1	1	0	1	0	1	1	1	1	0	0	1	0	0	0	0	0	0	1	0	0	0	0	0	0	0	0	0	0	0	0	0	0	0	0	0	0	1	0	0	0	0	0	0	0	0	0
SlGA3ox2	1	1	1	1	1	1	1	1	1	1	0	0	0	1	1	0	0	0	0	0	1	0	0	0	0	0	1	0	0	0	0	0	0	0	0	0	0	0	0	1	0	0	0	0	0	0	0	0	0
SlGA3ox1	1	1	1	1	1	1	1	1	1	1	1	0	0	1	1	0	0	0	0	0	1	0	0	0	0	0	0	0	0	0	0	0	0	0	0	0	0	0	0	1	0	0	0	0	0	0	0	0	0
AtGA3ox4	1	1	1	1	1	1	1	1	1	1	0	0	0	1	1	0	0	0	0	0	1	0	0	0	0	0	0	0	0	0	0	0	0	0	0	0	0	0	0	1	0	0	0	0	0	0	0	0	1
AtGA3ox1	1	1	1	1	1	1	1	1	1	1	1	0	0	1	1	0	0	0	0	0	1	0	0	0	0	0	0	0	0	0	0	0	0	0	0	0	0	0	1	1	0	0	0	0	0	0	0	0	0
AtGA3ox2	1	1	1	1	1	1	1	1	1	1	1	0	0	1	1	0	0	0	0	0	1	0	0	0	0	0	0	0	0	0	0	0	0	0	0	0	0	0	0	1	0	0	0	0	0	0	0	0	0
SlGA20ox8	0	1	1	0	1	1	0	1	0	0	0	0	0	0	0	0	0	0	0	0	0	0	0	0	0	0	0	0	0	0	0	0	0	0	0	0	0	0	0	0	0	0	0	0	0	0	0	0	0
SlGA20ox10	0	0	0	1	1	0	0	1	1	0	0	1	0	0	0	0	0	0	0	0	0	0	0	0	0	0	0	0	0	0	0	0	0	0	0	0	0	0	0	0	0	0	0	0	0	0	0	0	0
SlGA20ox9	0	1	1	1	0	1	1	1	1	0	0	0	0	0	0	0	0	0	0	0	0	0	0	0	0	0	0	0	0	1	0	0	0	0	0	0	0	0	0	0	0	0	0	0	0	0	0	0	0
SlGA20ox6	1	1	1	1	1	1	1	1	1	1	0	1	0	1	1	1	0	0	1	0	0	0	0	0	0	0	1	0	1	1	0	0	0	0	0	0	0	0	0	0	0	0	0	0	0	0	0	0	0
SlGA20ox5	1	1	1	1	1	1	1	1	1	1	0	1	0	1	1	0	0	0	1	0	0	0	0	0	0	0	1	0	1	1	0	0	0	0	0	0	0	0	0	0	0	0	0	0	0	0	0	0	0
SlGA20ox1	1	1	1	1	1	1	1	1	1	1	0	1	0	1	1	1	0	0	1	0	0	0	0	0	0	0	1	0	1	1	0	0	0	0	0	0	0	0	0	0	0	0	0	0	0	0	0	0	0
SlGA20ox3	1	1	1	1	1	1	1	1	1	1	0	1	0	1	1	1	0	0	1	0	0	0	0	0	0	0	1	0	1	1	0	0	0	0	0	0	0	0	0	0	0	0	0	0	0	0	0	0	0
SlGA20ox2	1	1	1	1	1	1	1	1	1	1	0	1	0	1	1	1	0	0	1	0	0	0	0	0	0	0	1	0	1	1	0	0	0	0	0	0	0	0	0	0	0	0	0	0	0	0	0	0	0
SlGA20ox4	1	1	1	1	1	1	1	1	1	1	0	1	0	0	1	1	0	0	1	0	0	0	0	0	0	0	1	0	1	1	0	0	0	0	0	0	0	0	0	0	0	0	0	0	0	0	0	0	0
AtGA20ox3	1	1	0	1	1	1	1	1	1	1	0	1	0	1	1	1	0	0	1	0	0	0	0	0	0	0	1	0	1	1	0	0	0	0	0	0	0	0	0	0	0	0	0	0	0	0	0	0	0
AtGA20ox4	1	1	1	1	1	1	1	1	1	1	0	1	0	1	0	1	0	0	1	0	0	0	0	0	0	0	1	0	1	1	0	0	0	0	0	0	0	0	0	0	0	0	0	0	0	0	0	0	0
AtGA20ox1	1	1	1	1	1	1	1	1	1	1	0	1	0	1	1	1	0	0	1	0	0	0	0	0	0	0	1	0	1	1	0	0	0	0	0	0	0	0	0	0	0	0	0	0	0	0	0	0	0
AtGA20ox2	1	1	0	1	1	1	1	1	1	1	0	1	0	1	0	1	0	0	1	0	0	0	0	0	0	0	1	0	1	1	0	0	0	0	0	0	0	0	0	0	0	0	0	0	0	0	0	0	0
OsGA20ox1	1	1	1	1	1	1	1	1	1	0	0	1	0	1	1	1	0	0	1	0	0	0	0	0	0	0	1	0	1	1	0	0	0	0	0	0	0	0	0	0	0	0	0	0	0	0	0	0	0
SlGA20ox7	0	1	1	0	1	0	0	0	0	0	0	0	0	0	0	0	0	0	0	0	0	0	0	0	0	0	0	0	0	0	0	0	0	0	0	0	0	0	0	0	0	0	0	0	0	0	0	0	0
OsGA20ox3	1	1	1	1	1	1	1	1	1	1	0	1	0	1	1	1	0	0	1	0	0	0	0	0	0	0	1	0	1	1	0	0	0	0	0	0	0	0	0	0	0	0	0	0	0	0	0	0	0
SlGA20ox11	1	1	1	1	1	1	1	1	1	0	0	1	0	0	0	0	0	0	0	0	0	0	0	0	0	0	1	0	0	1	0	0	0	0	0	0	0	0	0	0	0	0	0	0	0	0	0	0	0
AtGA20ox5	1	1	1	1	1	1	1	1	1	1	0	1	0	1	1	1	0	0	0	0	0	0	0	0	0	0	1	0	1	1	0	0	0	0	0	0	0	0	0	0	0	0	0	0	0	0	0	0	0
OsGA20ox2	1	1	1	1	1	1	1	1	1	1	0	1	0	1	0	1	0	0	0	0	0	0	0	0	0	0	1	0	1	1	0	0	0	0	0	0	0	0	0	0	0	0	0	0	0	0	0	0	0
OsGA20ox4	1	1	1	1	1	1	1	1	1	1	0	1	0	0	0	1	0	0	0	0	0	0	0	0	0	0	1	0	1	1	0	0	0	0	0	0	0	0	0	0	0	0	0	0	0	0	0	0	0
Solyc12g013780.1.1	1	1	0	1	1	1	1	1	2	1	0	1	0	1	0	0	0	0	0	0	0	0	0	0	0	0	1	0	0	0	0	0	0	0	0	0	0	0	0	0	0	0	0	0	0	0	0	0	0
OsGA2ox1	1	1	0	1	1	1	1	1	1	0	0	0	0	1	1	0	0	0	0	0	1	0	0	1	0	0	1	0	0	0	0	0	0	0	1	0	0	0	0	0	0	1	0	0	0	0	0	0	0
AtGA2ox6	1	1	0	1	1	1	1	1	1	1	0	0	0	1	1	0	0	0	0	0	1	0	0	1	0	0	0	0	0	0	0	0	0	0	1	0	0	0	0	0	0	0	0	0	0	0	0	0	0
SlGA2ox3	1	1	0	1	1	1	1	1	1	1	0	0	0	1	0	0	0	0	0	0	1	0	0	1	0	0	1	0	0	0	0	0	0	0	1	0	0	0	0	0	0	0	0	0	0	0	0	0	0
AtGA2ox4	1	1	0	1	1	1	1	1	1	1	0	0	0	1	1	0	0	0	0	0	0	0	0	1	0	0	0	0	0	0	0	0	0	0	1	0	0	0	0	0	0	0	0	0	0	0	0	0	0
SlGA2ox6	0	1	0	1	1	1	1	0	0	0	0	0	0	1	1	0	0	0	0	0	0	0	0	1	0	0	0	0	0	0	0	0	0	0	1	0	0	0	0	0	0	0	0	0	0	0	0	0	0
SlGA2ox1	1	1	0	1	0	1	1	1	1	1	0	0	0	1	0	0	0	0	0	0	1	0	0	1	0	0	0	0	0	0	0	0	0	0	1	0	0	0	0	0	0	0	0	0	0	0	0	0	0
OsGA2ox10	0	0	0	1	1	0	1	1	0	0	0	1	0	0	0	0	0	0	0	0	1	0	0	1	0	0	1	0	0	0	0	0	0	0	0	0	0	0	0	0	0	0	0	0	0	0	0	0	0
OsGA2ox8	1	1	0	1	1	1	1	1	1	1	0	1	0	1	1	0	1	0	0	0	1	0	0	1	0	0	0	0	0	0	0	0	0	0	1	0	0	0	0	0	0	0	0	0	0	0	0	0	0
OsGA2ox4	1	1	0	1	1	1	1	1	1	1	0	1	0	1	0	0	0	0	0	0	1	0	0	1	0	0	1	0	0	0	0	0	0	0	1	0	0	0	0	0	0	0	0	0	0	0	0	0	0
OsGA2ox3	1	1	0	1	1	1	1	1	1	1	0	1	0	1	1	0	0	0	0	0	1	0	0	1	0	0	1	0	0	0	0	0	0	0	1	0	0	0	0	0	0	0	0	0	0	0	0	0	0
OsGA2ox7	1	1	0	1	0	1	1	0	1	0	0	1	0	1	0	0	0	0	0	0	0	0	0	1	0	0	1	0	0	0	0	0	0	0	1	0	0	0	0	0	0	0	0	0	0	0	0	0	0
AtGA2ox1	1	1	0	1	1	1	1	1	1	1	0	1	0	1	1	0	0	0	0	0	0	0	0	1	0	0	1	0	0	0	0	0	0	0	1	0	0	0	0	0	0	0	0	0	0	0	0	0	0
AtGA2ox3	1	1	0	1	1	1	1	1	1	1	0	1	0	1	1	0	0	0	0	0	1	0	0	1	0	0	1	0	0	0	0	0	0	0	1	0	0	0	0	0	0	0	0	0	0	0	0	0	0
AtGA2ox2	1	1	0	1	1	1	1	1	1	1	0	1	0	1	1	0	0	0	0	0	1	0	0	1	0	0	1	0	0	0	0	0	0	0	1	0	0	0	0	0	0	0	0	0	0	0	0	0	0
SlGA2ox8	1	1	0	1	1	1	1	1	1	1	0	1	0	1	1	0	0	0	0	0	1	0	0	1	0	0	0	0	0	0	0	0	0	0	1	0	0	0	0	0	0	0	0	0	0	0	0	0	0
SlGA2ox7	1	1	0	1	1	1	1	1	1	1	0	1	0	1	1	0	0	0	0	0	1	0	0	1	0	0	0	0	0	0	0	0	0	0	1	0	0	0	0	0	0	0	0	0	0	0	0	0	0
SlGA2ox9	0	1	0	1	1	1	1	1	0	0	0	0	0	1	0	0	0	0	0	0	0	0	0	1	0	0	0	0	0	0	0	0	0	0	1	0	0	0	0	0	0	0	0	0	0	0	0	0	0
SlGA2ox2	1	1	0	1	1	1	1	1	1	1	0	0	0	1	1	0	0	0	0	0	1	0	0	1	0	0	1	0	0	0	0	0	0	0	1	0	0	0	0	0	0	0	0	0	0	0	0	0	0
SlGA2ox5	1	1	0	1	1	1	1	1	1	1	0	1	0	1	1	0	0	0	0	0	1	0	0	1	0	0	1	0	0	0	0	0	0	0	1	0	0	0	0	0	0	0	0	0	0	0	0	0	0
SlGA2ox4	1	1	0	1	1	1	1	1	1	1	0	1	0	1	1	0	0	0	0	0	1	0	0	1	0	0	1	0	0	0	0	0	0	0	1	0	0	0	0	0	0	0	0	0	0	0	0	0	0
LOC Os03g42130.1	1	1	0	1	1	1	1	1	1	1	0	0	0	1	1	0	0	0	0	0	0	0	0	0	0	0	1	0	0	0	0	0	0	0	0	0	0	0	0	0	0	0	0	0	0	1	0	0	0
LOC Os08g15149.1	1	1	0	1	1	1	0	0	1	1	0	0	0	1	1	0	0	0	0	0	0	0	0	0	0	0	0	0	0	0	0	0	0	0	0	0	0	0	0	0	0	0	0	0	0	1	0	0	0
AT3G19000.1	1	1	1	1	1	1	1	1	1	1	1	0	0	0	1	0	0	0	0	0	0	0	0	0	0	0	0	0	0	1	0	0	0	0	0	0	0	0	0	0	0	0	0	0	0	1	0	0	0
AT3G19010.1	1	1	1	1	1	1	1	1	1	1	1	0	0	0	1	0	0	0	0	0	0	0	0	0	0	0	0	0	0	1	0	0	0	0	0	0	0	0	0	0	0	0	0	0	0	1	0	0	0
Solyc01g108860.2.1	1	1	1	1	1	1	1	1	1	1	1	0	0	1	1	0	0	0	0	0	0	0	0	0	0	0	0	0	0	1	0	0	0	0	0	0	0	0	0	0	0	0	0	0	0	1	0	0	0
Solyc01g108880.2.1	1	1	1	1	1	1	1	1	1	1	1	0	0	1	1	0	0	0	0	0	0	0	0	0	0	0	0	0	0	1	0	0	0	0	0	0	0	0	0	0	0	0	0	0	0	1	0	0	0
Solyc01g108870.2.1	0	1	0	0	0	1	0	0	0	0	0	0	0	1	1	0	0	0	0	0	0	0	0	0	0	0	0	0	0	0	0	0	0	0	0	0	0	0	0	0	0	0	0	0	0	0	0	0	0
AT3G46480.1	0	1	0	1	1	1	1	1	1	1	0	0	0	0	0	0	0	0	0	0	0	0	0	0	0	0	1	0	0	0	0	1	0	0	0	0	0	0	0	0	0	0	1	0	0	0	0	1	0
AT3G46500.1	0	1	0	1	1	1	1	1	0	0	0	0	0	0	0	0	0	0	0	0	0	0	0	0	0	0	1	0	0	0	0	1	0	0	0	0	0	0	0	0	0	0	1	0	0	0	0	1	0
AT3G46490.1	1	1	0	1	1	1	1	1	1	0	0	0	0	0	0	0	0	0	0	0	0	0	0	0	0	0	1	0	0	0	0	1	0	0	0	0	0	0	0	0	0	0	1	0	0	0	0	1	0
AT1G35190.1	1	1	0	1	1	1	1	1	1	0	0	0	0	0	0	0	0	0	0	0	0	0	0	0	0	0	1	0	0	0	0	1	0	0	0	0	0	0	0	0	0	0	1	0	0	0	0	1	0
Solyc05g018130.2.1	1	1	0	1	1	1	1	1	1	1	0	0	0	0	0	0	0	0	0	0	0	0	0	0	0	0	1	0	0	0	0	1	0	0	0	0	0	0	0	0	0	0	1	0	0	0	0	1	0
LOC Os01g09300.1	1	1	0	1	1	1	1	1	1	0	0	0	0	0	0	0	0	0	0	0	0	0	0	0	0	0	1	0	0	0	0	1	0	0	0	0	0	0	0	0	0	0	1	0	0	0	0	1	0
LOC Os10g37899.1	1	1	0	1	1	1	1	1	1	1	0	0	0	0	0	0	0	0	0	0	0	0	0	0	0	0	0	0	0	0	0	1	0	0	0	0	0	0	0	0	0	0	1	0	0	0	0	1	0
LOC Os10g37880.1	1	1	0	1	1	1	1	1	1	1	0	0	0	0	0	0	0	0	0	0	0	0	0	0	0	0	1	0	0	0	0	1	0	0	0	0	0	0	0	0	0	0	1	0	0	0	0	1	0
Solyc06g060800.2.1	1	1	0	1	1	1	1	1	1	1	0	0	0	0	0	0	0	0	0	0	0	0	0	0	0	0	1	0	0	0	0	1	0	0	0	0	0	0	0	0	0	0	1	0	0	0	0	1	0
Solyc08g078330.2.1	1	1	0	1	1	1	1	1	1	1	0	0	0	0	0	0	1	0	0	0	0	0	0	0	0	0	0	0	0	0	0	0	0	0	0	0	0	0	0	0	0	0	1	0	0	0	0	1	0
AT4G16765.1	0	1	0	1	1	1	1	1	0	0	0	0	0	0	0	0	0	0	0	0	0	0	0	0	0	0	1	0	0	0	0	1	0	0	0	0	0	0	0	0	0	0	1	0	0	0	0	1	0
AT4G16770.1	1	1	0	1	1	1	1	1	1	1	0	0	0	0	0	0	0	0	0	0	0	0	0	0	0	0	0	0	0	0	0	1	0	0	0	0	0	0	0	0	0	0	1	0	0	0	0	1	0
LOC Os09g07020.1	1	1	0	1	1	1	1	1	1	1	1	0	0	0	0	0	0	0	0	0	0	0	0	0	0	0	0	0	0	0	0	1	0	0	0	0	0	0	0	0	0	0	1	0	0	1	1	0	0
Solyc02g093070.2.1	1	1	0	1	1	1	1	1	1	1	1	0	0	1	0	0	0	0	0	0	0	0	0	0	0	0	0	0	0	0	0	1	0	0	0	0	0	0	0	0	0	0	1	0	0	1	1	0	0
Solyc02g093080.2.1	1	1	0	1	1	1	1	1	1	1	1	0	0	1	0	0	0	0	0	0	0	0	0	0	0	0	0	0	0	0	0	1	0	0	0	0	0	0	0	0	0	0	1	0	0	1	1	0	0
AT3G50210.1	1	1	0	1	1	1	1	0	1	1	1	0	0	0	0	0	0	0	0	0	0	0	0	0	0	0	0	0	0	0	0	1	0	0	0	0	0	0	0	0	0	0	1	0	0	1	0	0	0
AT3G49620.1	1	1	0	1	1	1	1	0	1	1	1	0	0	0	0	0	0	0	0	0	0	0	0	0	0	0	0	0	0	0	0	1	0	0	0	0	0	0	0	0	0	0	1	0	0	1	0	0	0
AT3G49630.1	1	1	0	1	1	1	1	0	1	1	1	0	0	0	0	0	0	0	0	0	0	0	0	0	0	0	0	0	0	0	0	1	0	0	0	0	0	0	0	0	0	0	1	0	0	1	0	0	0
Solyc03g120970.2.1	1	1	0	0	1	1	0	0	0	0	0	0	0	0	0	0	0	0	0	0	0	0	0	0	0	0	0	0	0	0	0	0	0	0	0	0	0	0	0	0	0	0	0	0	0	0	0	0	0
LOC Os10g14180.1	0	1	0	0	1	0	0	0	0	0	0	0	0	0	0	0	0	0	0	0	0	0	0	0	0	0	0	0	0	0	0	0	0	0	0	0	0	0	0	0	0	0	0	0	0	0	0	0	0
AT3G63290.1	0	1	0	0	0	0	0	0	0	0	0	0	0	0	0	0	1	0	0	0	0	0	0	0	0	0	0	0	0	0	0	0	0	0	0	0	0	0	0	0	0	0	0	0	0	0	0	0	0
LOC Os04g55070.1	1	1	0	1	1	1	1	1	1	1	1	0	0	1	0	0	0	0	0	0	0	0	0	0	0	0	0	0	0	0	0	0	0	0	0	0	0	0	0	0	0	0	1	0	0	0	0	0	0
Solyc06g069900.2.1	1	1	0	1	1	1	1	1	2	1	1	0	0	1	0	0	0	0	0	0	0	0	0	0	0	0	0	0	0	0	0	0	0	0	0	0	0	0	0	0	0	0	1	0	0	0	0	0	0
Solyc03g116290.1.1	1	1	0	1	1	1	1	1	2	1	0	0	0	1	0	0	0	0	0	0	0	0	0	0	0	0	0	0	0	0	0	0	0	0	0	0	0	0	0	0	0	0	0	0	0	0	0	0	0
Solyc03g116270.2.1	1	1	0	1	1	1	1	1	1	1	0	0	0	1	0	0	0	0	0	0	0	0	0	0	0	0	1	0	0	0	0	0	0	0	0	0	0	0	0	0	0	0	1	0	0	0	0	0	0
Solyc03g116260.2.1	1	1	0	1	1	1	1	1	1	1	1	0	0	1	0	0	0	0	0	0	0	0	0	0	0	0	0	0	0	0	0	0	0	0	0	0	0	0	0	0	0	0	1	0	0	0	0	0	0
Solyc03g116280.2.1	0	1	0	0	1	1	0	0	0	0	0	0	0	1	0	0	0	0	0	0	0	0	0	0	0	0	0	0	0	0	0	0	0	0	0	0	0	0	0	0	0	0	1	0	0	0	0	0	0
Solyc03g025490.2.1	1	1	0	1	1	1	1	1	1	1	0	0	0	1	0	0	0	0	0	0	0	0	0	1	0	0	0	0	0	0	0	0	0	0	0	0	0	0	0	0	0	0	0	0	0	0	0	0	0
Solyc01g094590.2.1	0	1	0	1	1	1	0	1	0	0	0	0	0	1	1	0	0	0	0	0	0	0	0	0	0	0	0	0	0	0	0	0	0	0	0	0	0	0	0	0	0	0	0	0	0	0	0	0	0
AT5G51310.1	1	1	0	1	1	1	1	1	1	1	0	0	0	1	0	0	0	0	0	0	0	0	0	0	0	0	1	0	0	0	0	0	0	0	0	0	0	0	0	0	0	0	0	0	0	0	0	0	0
AT4G23340.1	1	1	0	1	1	1	0	1	1	1	0	0	0	1	1	0	0	0	0	0	0	0	0	0	0	0	1	0	0	0	0	0	0	0	0	0	0	0	0	0	0	0	0	0	0	0	0	0	0
SlDAO2	1	1	0	1	1	1	1	1	1	1	0	0	0	1	1	0	0	0	0	0	0	0	0	0	0	0	1	0	0	0	0	0	0	0	0	0	1	0	0	0	0	0	0	1	0	0	1	0	0
SlDAO1	1	1	0	1	1	1	1	1	1	1	0	0	0	1	1	0	0	0	0	0	0	0	0	0	0	0	1	0	0	0	0	0	0	0	0	0	1	0	0	0	0	0	0	1	0	0	1	0	0
SlDAO3	0	1	0	1	1	1	1	1	1	0	0	0	0	0	1	0	0	0	0	0	0	0	0	0	0	0	1	0	0	0	0	0	0	0	0	0	0	0	0	0	0	0	0	1	0	0	0	0	0
AtDAO2	1	1	0	1	1	1	1	1	0	1	0	0	0	0	1	0	0	0	0	0	0	1	0	0	0	0	1	0	0	0	0	0	0	0	0	0	0	0	0	0	0	0	0	1	0	0	0	0	0
AtDAO1	1	1	0	1	1	1	1	1	0	1	0	0	0	0	1	0	0	0	0	0	0	0	0	0	0	0	1	0	0	0	0	0	0	0	0	0	0	0	0	0	0	0	0	1	0	0	1	0	0
OsDAO	1	1	0	1	1	1	1	1	1	1	0	0	0	1	1	0	0	0	0	0	0	0	0	0	0	0	1	0	0	0	0	0	0	0	0	0	0	0	0	0	0	0	0	1	0	0	0	0	0
AT4G03050.2	0	1	0	1	1	1	1	1	1	0	0	0	0	0	1	0	0	0	0	0	0	0	0	0	0	0	0	0	0	0	0	1	0	0	0	0	0	0	0	0	0	0	0	0	0	0	0	0	0
LOC Os08g32160.1	0	1	0	1	1	0	1	1	1	1	1	0	0	0	1	0	0	0	0	0	0	0	0	0	0	0	0	0	0	0	0	0	0	0	0	0	0	0	0	0	0	0	1	0	0	0	0	0	0
LOC Os08g32170.1	0	1	0	1	1	0	1	1	1	1	1	0	0	0	1	0	0	0	0	0	0	0	0	1	0	0	0	0	0	0	0	0	0	0	0	0	0	0	0	0	0	0	1	0	0	0	0	0	0
LOC Os05g50090.1	0	1	0	1	1	1	1	0	1	0	0	0	0	0	1	0	0	0	0	0	0	0	0	0	0	0	1	0	0	0	0	0	0	0	0	1	0	0	0	0	0	1	0	0	0	0	0	0	0
Solyc01g090630.2.1	0	1	0	1	1	1	0	0	1	1	1	0	0	0	1	0	0	0	0	0	0	0	0	0	0	0	0	0	0	0	0	1	0	0	0	1	0	0	0	0	0	0	0	0	0	0	0	0	0
Solyc01g090610.2.1	0	1	0	1	1	1	0	0	1	1	1	0	0	0	1	0	0	0	0	0	0	0	0	0	0	0	0	0	0	0	0	1	0	0	0	1	0	0	0	0	0	1	0	0	0	0	0	0	0
Solyc06g067860.2.1	0	1	0	1	1	1	1	0	1	0	1	0	0	0	1	0	0	0	0	0	0	0	0	0	0	0	0	0	0	0	0	1	0	0	0	1	0	0	0	0	0	1	0	0	0	0	0	0	0
AT1G52800.1	0	1	0	1	1	1	1	1	1	0	1	0	0	0	1	0	0	0	0	0	0	0	0	0	0	0	0	0	0	0	0	1	0	0	0	1	0	0	0	0	0	1	0	0	0	0	0	0	0
Solyc06g067870.2.1	0	1	0	1	1	1	0	1	1	1	1	0	0	1	1	0	0	0	0	0	0	0	0	0	0	0	0	0	0	0	0	1	0	0	0	1	0	0	0	0	0	1	0	0	0	0	0	0	0
AT1G52790.1	0	1	0	1	0	1	0	0	1	1	1	0	0	0	1	0	0	0	0	0	0	0	0	0	0	0	0	0	0	0	0	1	0	0	0	1	0	0	0	0	0	1	0	0	0	0	0	0	0
Solyc12g042980.1.1	0	1	0	1	0	0	1	1	1	0	0	0	0	0	1	0	0	0	0	0	0	0	0	0	0	0	0	0	0	0	0	1	0	0	0	1	0	0	0	0	0	1	0	0	1	0	0	0	0
AT1G80320.1	0	1	0	1	1	1	1	1	0	0	1	0	0	0	1	0	0	0	0	0	0	0	0	0	0	0	0	0	0	0	0	1	0	0	0	1	0	0	0	0	0	0	0	0	0	0	0	0	0
AT1G15540.1	0	1	0	1	1	1	0	0	1	1	0	0	0	0	1	0	0	0	0	0	0	0	0	0	0	0	0	0	0	0	0	1	0	0	0	1	0	0	0	0	0	0	0	0	0	0	0	0	0
Solyc06g066860.1.1	0	1	0	1	1	1	1	1	1	1	1	0	0	1	1	0	0	0	0	0	0	0	0	0	0	0	0	0	0	0	0	1	0	0	0	1	0	0	0	0	0	0	0	0	0	0	0	0	0
Solyc06g066840.2.1	0	1	0	1	1	1	1	1	1	1	1	0	0	0	1	0	0	0	0	0	0	0	0	0	0	0	0	0	0	0	0	1	0	0	0	1	0	0	0	0	0	1	0	0	0	0	0	0	0
Solyc06g066830.2.1	0	1	0	1	1	1	1	1	1	1	1	0	0	0	1	0	0	0	0	0	0	0	0	0	0	0	0	0	0	0	0	1	0	0	0	1	0	0	0	0	0	1	0	0	0	0	0	0	0
AT1G52820.1	0	1	0	1	1	1	1	1	1	1	1	0	0	0	1	0	0	0	0	0	0	0	0	0	0	0	0	0	0	0	0	1	0	0	0	1	0	0	0	0	0	1	0	0	0	0	0	0	0
AT4G03070.1	0	1	0	1	1	1	1	1	1	1	1	0	0	1	1	0	0	0	0	0	0	0	0	0	0	0	0	0	0	0	0	1	0	0	0	1	0	0	0	0	0	0	0	0	0	0	0	0	0
AT1G28030.1	0	1	0	1	1	1	0	1	1	1	1	0	0	1	1	0	0	0	0	0	0	0	0	0	0	0	0	0	0	0	0	1	0	0	0	1	0	0	0	0	0	0	0	0	0	0	0	0	0
Solyc12g100170.1.1	0	1	0	1	0	1	0	1	0	1	1	0	0	0	1	0	0	0	0	0	0	0	0	0	0	0	0	0	0	0	0	0	0	0	0	1	0	0	0	0	0	0	0	0	0	0	0	0	0
Solyc02g062490.2.1	0	1	0	1	1	1	0	1	0	0	0	0	0	0	1	0	0	0	0	0	0	0	0	0	0	0	0	0	0	0	0	1	0	0	0	0	0	0	0	0	0	0	0	0	0	0	0	0	0
Solyc02g062500.2.1	0	1	0	1	1	1	1	1	1	1	1	0	0	0	1	0	0	0	0	0	0	0	0	0	0	0	0	0	0	0	0	1	0	0	0	1	0	0	0	0	0	1	0	0	0	0	0	0	0
Solyc02g062460.2.1	0	1	0	1	1	1	1	1	1	1	1	0	0	0	1	0	0	0	0	0	0	0	0	0	0	0	0	0	0	0	0	1	0	0	0	1	0	0	0	0	0	1	0	0	0	0	0	0	0
Solyc01g006580.2.1	0	1	0	1	1	0	1	1	1	1	1	0	0	0	1	0	0	0	0	0	0	0	0	0	0	0	0	0	0	0	0	1	0	0	0	1	0	0	0	0	0	1	0	0	0	0	0	0	0
Solyc01g006610.1.1	0	1	0	1	1	0	1	1	1	1	1	0	0	0	1	0	0	0	0	0	0	0	0	0	0	0	0	0	0	0	0	1	0	0	0	1	0	0	0	0	0	1	0	0	0	0	0	0	0
[truncated: 1 more columns]

## Sheet: Sheet5
Table S5 Motif sequence identified by MEME tools in Arabidopsis, rice and tomato DOXC class of 2OGDs
Motif	Consensus sequence	Best Possible Match	E-value	Sites	Length
1		ACEEWGFFQVVNHGV	4.2E-2389	270	15
2		ZIJSNGRYKSVEHRV	5.9E-2233	330	15
3		NYYPPCPZPELTLG	2.8E-1850	242	15
4		PHTDPGFJTJLLQDD	1.2E-1783	334	15
5		WVDVPPIPGALVVNI	1.4E-1681	317	15
6		NSEKERISVAFFYNP	1.6E-1065	318	15
7		LAEKJLELLSESLGL	1.1E-871	269	15
8		VGGLQVLKDGG	3.0E-811	302	11
9		FFELPLEEKKK	3.1E-650	250	11
10		SIPVIDLSGLD	4.0E-608	302	11
11		WPDNPPKFREV	6.1E-465	205	11
12		QKLBWRDYLFL	6.4E-413	220	11
13		KAFDDTKAGVKGLVD	1.9E-387	58	15
14		YKEFTFGEYLK	4.6e-298	155	11
15		VIGPLPELVDEENPP	2.0E-355	195	11
16		TTIPSRYVRPEEERP	6.9e-312	132	15
17		EEJPEVCREILLEYS	1.9e-225	64	15
18		SKGLDGKSALDHFKI	1.3e-223	85	15
19		YSRDVTKKVRYGSNF	6.5e-193	79	15
20		HLKDMDCAKGLLMLC	1.6e-183	38	15
21		QSPASIEGYGSKFVV	1.4e-174	71	15
22		VLEEMIDGVRRFHEQ	1.2e-163	34	15
23		PLPSSRVYGPIKELL	1.4e-148	32	15
24		EKSDSVLRLNHYPPC	3e-117	24	15
25		YAGLKFQAKEPRFEA	6.4e-107	18	15
26		AGITEIPRIFHHPPD	4.7e-85	24	15
27		DFREVMEEYAKAMEK	6.8e-83	85	15
28		TKGHYKKCMEQRFKE	7.4e-76	10	15
29		FTQKHYRADMNTLQA	2.4e-81	13	15
30		HFKEFFEDNDSIMRL	6.8e-71	16	15
31		EKGYLKKAFYGSKGP	1e-60	12	15
32		LGSPFYLLRLLKYPG	1.2e-58	38	15
33		SLLVPSVQELAKQKL	5.9e-53	21	15
34		EDPIKRKEIVEKVRD	4.3e-48	22	15
35		AYKTRLADNRLGLFE	9.8e-48	17	15
36		VFKALZEYGCFEASY	1.9e-52	14	15
37		MAPBPPSP	3.7e-43	36	8
38		WPEPIVRVQSLSESG	2.6e-51	11	15
39		RHLPVSNISDIPDLD	1.2e-47	12	15
40		SFFSKLMWSEGFTI	9.6e-40	8	14
41		YIEEVLGEZGQHMAV	2.1e-38	19	15
42		FHGYVGQIPQLPLYE	4.8e-35	12	15
43		SHDCVVECLPTCKSE	4.7e-33	12	15
44		WPCQFRINKYHFTPE	4.1e-32	5	15
45		FSNGSYRWGTPTATS	5.5e-32	7	15
46		NITKGVPDMHEAIDC	3.7e-30	11	15
47		LMDEVKKVVRE	2.1e-29	45	11
48		KHRGYTPLYDEKLDP	3.3e-28	12	15
49		EMRELFSDGVQSMRM	5.4e-25	15	15
50		RYPPIKCSDYLSERY	6.1e-25	16	15

## Sheet: Sheet6
Table S6 Primers used in this study
Gene Name		Primers for qRT-PCR (5’→3’)
SlActin	F:	TGTCCCTATCTACGAGGGTTATGC
	R:	CAGTTAAATCACGACCAGCAAGAT
SlDAO1	F:	GGTATCTATTGCTTCATTCA
	R:	TTGAGTAACGGAGCTTTCTA
SlDAO2	F:	GGTCTCGAGGTCATGAAGAA
	R:	ATGCTTGGCGGAGTATAGTC
SlGA2ox2	F:	GGAGAACATACTGACCCACAAA
	R:	CAGAGATCCAGTGTCCATCTTTC
SlGA2ox4	F:	AACCTGCCATTACTCACTTCC
	R:	GAGGTTCTTGGAGTTGGCTTTA
SlGA2ox5	F:	CTCGAATCCGAAGCCATCAA
	R:	TCGCCACTTTGTCCGATTT
